# Supplementary material for: The Effect of Adolescent Pregnancy on Child Mortality in 46 Low- and Middle-Income Countries
Source: PubMed Central journal article supplement (PMC9066488; doi:10.1136/bmjgh-2021-007681), 2022-05-03
Supplement: bmjgh-2021-007681supp001.pdf [file bmjgh-2021-007681supp001.pdf]

## Supplementary Material

### The Effect of Adolescent Pregnancy on Child Mortality in 46 Low- and Middle-Income Countries

Navideh Noori<sup>1,\*</sup>, Joshua L. Proctor<sup>1</sup>, Yvette Efevbera<sup>2</sup>, and Assaf P. Oron<sup>3</sup>

<sup>1</sup>Institute for Disease Modeling, Global Health Division, Bill and Melinda Gates Foundation, Seattle, WA, USA

<sup>2</sup> Gender Equality Division, Bill and Melinda Gates Foundation, Seattle, WA, USA

<sup>3</sup> Institute for Health Metrics and Evaluation, University of Washington, Seattle, WA, USA.

\*Corresponding author, [navideh.noori@gatesfoundation.org](mailto:navideh.noori@gatesfoundation.org)

**Appendix 1.** List of countries in Sub-Saharan Africa (SSA) and South Asia with survey data

**Table 1.** Characteristics of the study population for the child health outcomes in SSA (Unweighted data). All numbers represent women's first birth out of their entire birth history, unless noted otherwise.

**Table 2.** Characteristics of the study population for the child health outcomes in South Asia (Unweighted data). All numbers represent women's first birth out of their entire birth history, unless noted otherwise.

**Table 3.** Child and 1-59 months mortality rates and their sampling errors in SSA

**Table 4.** Child and 1-59 months mortality rates and their sampling errors in South Asia

**Figure 1.** Ratios associated with 1-59 months and child mortality in SSA and South Asia for the 2014-2018 survey period. Reference group is mothers aged 23-25 years old who live in rural areas and have no formal education (Model 1).

**Figure 2.** Ratios associated with 1-59 months and child mortality in SSA and South Asia for the 2014-2018 survey period. Reference group is mothers aged 23-25 years old who delivered at home, and had no ANC visit (Model 2)

**Figure 3.** Ratios associated with neonate, infant, child, 1-59 months, under-5 years, and stillbirth in SSA and South Asia for the 2014-2018 survey period. Reference group is mothers aged 23-25 years old who live in rural areas, have no formal education, and are in the poorer/middle/richer wealth quintile (Model 3).

**Figure 4.** Ratios associated with neonate, infant, child, 1-59 months, under-5 years, and stillbirth in SSA and South Asia for the 2014-2018 survey period. Reference group is mothers aged 23-25 years old who live in rural areas, have no formal education, are in the poorer/middle/richer wealth quintile, and had no ANC visit and at home delivery (Model 4).

**Figure 5.** Ratios associated with neonate, infant, child, 1-59 months, under-5 years, and stillbirth in SSA and South Asia for the 2009-2013 survey period. Reference group is mothers aged 23-25 years old (Model 0).

**Figure 6.** Ratios associated with neonate, infant, child, 1-59 months, under-5 years, and stillbirth in SSA and South Asia for the 2009-2013 survey period. Reference group is mothers aged 23-25 years old who live in rural areas and have no formal education (Model 1).

**Figure 7.** Ratios associated with neonate, infant, child, 1-59 months, under-5 years, and stillbirth in SSA and South Asia for the 2009-2013 survey period. Reference group is mothers aged 23-25 years old who delivered at home, and had no ANC visit (Model 2).

**Figure 8.** Ratios associated with neonate, infant, child, 1-59 months, under-5 years, and stillbirth in SSA for the 2009-2013 survey period. Reference group is mothers aged 23-25 years old who live in rural areas, have no formal education, and are in the poorer/middle/richer wealth quintile (Model 3).

**Figure 9.** Ratios associated with neonate, infant, child, 1-59 months, under-5 years, and stillbirth in SSA for the 2009-2013 survey period. Reference group is mothers aged 23-25 years old who live in rural areas, have no formal education, are in the poorer/middle/richer wealth quintile, and had no ANC visit and at home delivery (Model 4).

**Figure 10.** Ratios associated with neonate, infant, child, 1-59 months, under-5 years, and stillbirth in SSA and South Asia for the 2004-2008 survey period. Reference group is mothers aged 23-25 years old (Model 0).

**Figure 11.** Ratios associated with neonate, infant, child, 1-59 months, under-5 years, and stillbirth in SSA and South Asia for the 2004-2008 survey period. Reference group is mothers aged 23-25 years old who live in rural areas and have no formal education (Model 1).

**Figure 12.** Ratios associated with neonate, infant, child, 1-59 months, under-5 years, and stillbirth in SSA and South Asia for the 2004-2008 survey period. Reference group is mothers aged 23-25 years old who delivered at home and have no ANC visits (Model 2).

**Figure 13.** Ratios associated with neonate, infant, child, 1-59 months, under-5 years, and stillbirth in SSA and South Asia for the 2004-2008 survey period. Reference group is mothers aged 23-25 years old who live in rural areas, have no formal education, and are in the poorer/middle/richer wealth quintile, (Model 3).

**Figure 14.** Ratios associated with neonate, infant, child, 1-59 months, under-5 years, and stillbirth in SSA and South Asia for the 2004-2008 survey period. Reference group is mothers aged 23-25 years old who live in rural areas, have no formal education, are in the poorer/middle/richer wealth quintile, and had no ANC visit and at home delivery (Model 4).

**Figure 15.** Ratios associated with neonate, infant, child, 1-59 months, under-5 years, and stillbirth in SSA for the 2014-2018 survey period. Reference group is mothers aged 23-25 years old.

**Figure 16.** Ratios associated with neonate, infant, child, 1-59 months, under-5 years, and stillbirth in SSA for the 2014-2018 survey period. Reference group is mothers aged 23-25 years old who live in rural areas, and have no formal education.

**Appendix 1. List of countries in Sub-Saharan Africa (SSA) and South Asia with survey data**

Angola, Benin, Burkina Faso, Burundi, Democratic Republic of Congo, Congo, Côte d'Ivoire, Cameroon, Ethiopia, Gabon, Ghana, Gambia, Guinea, Kenya, Comoros, Liberia, Lesotho, Madagascar, Mali, Malawi, Mozambique, Nigeria, Niger, Namibia, Rwanda, Sierra Leone, Senegal, Sao Tome and Principe, Chad, Togo, Tanzania, Uganda, South Africa, Zambia, Zimbabwe, Afghanistan, Bangladesh, India, Indonesia, Cambodia, Myanmar, Maldives, Nepal, Philippines, Pakistan, Timor-Leste.

Table 1. Characteristics of the study population for the child health outcomes in SSA (Unweighted data). All numbers represent women's first birth out of their entire birth history, unless noted otherwise.

| Maternal age at first birth       | 2004-2008      |                 |                 |                 |                 | 2009-2013      |                 |                 |                 |                 | 2014-2018      |                  |                 |                 |                 |
|-----------------------------------|----------------|-----------------|-----------------|-----------------|-----------------|----------------|-----------------|-----------------|-----------------|-----------------|----------------|------------------|-----------------|-----------------|-----------------|
|                                   | <16            | 16-17           | 18-19           | 20-22           | 23-25           | < 16           | 16-17           | 18-19           | 20-22           | 23-25           | < 16           | 16-17            | 18-19           | 20-22           | 23-25           |
| Total births (% <sup>a</sup> )    | 4404<br>(5.3)  | 14639<br>(17.7) | 23258<br>(28.1) | 27688<br>(33.4) | 12942<br>(15.6) | 5356<br>(4.9)  | 18569<br>(16.9) | 31204<br>(28.5) | 37062<br>(33.8) | 17451<br>(15.9) | 4157<br>(4.1)  | 16429<br>(16.4)  | 27787<br>(27.7) | 34526<br>(34.4) | 17544<br>(17.5) |
| Stillbirth (% <sup>b</sup> )      | 22<br>(1.5)    | 67 (0.8)        | 119<br>(0.7)    | 187<br>(0.5)    | 245<br>(0.6)    | 22 (1.2)       | 98<br>(0.9)     | 150<br>(0.6)    | 275<br>(0.6)    | 269<br>(0.5)    | 26<br>(1.9)    | 96 (1)           | 175<br>(0.8)    | 305<br>(0.7)    | 307<br>(0.7)    |
| Neonatal deaths (% <sup>c</sup> ) | 361<br>(8.2)   | 813<br>(5.6)    | 1040<br>(4.5)   | 1111<br>(4)     | 513<br>(4)      | 348<br>(6.5)   | 925<br>(5)      | 1187<br>(3.8)   | 1302<br>(3.5)   | 556<br>(3.2)    | 212<br>(5.2)   | 690<br>(4.3)     | 939<br>(3.5)    | 996 (3)         | 483<br>(2.8)    |
| Infant deaths (%)                 | 647<br>(14.7)  | 1623<br>(11.1)  | 1968<br>(8.5)   | 2104<br>(7.6)   | 935<br>(7.2)    | 618<br>(11.5)  | 1637<br>(8.8)   | 2190<br>(7)     | 2231 (6)        | 928<br>(5.3)    | 392<br>(9.6)   | 1107<br>(6.9)    | 1550<br>(5.7)   | 1656<br>(4.9)   | 758<br>(4.5)    |
| Child deaths (%)                  | 316<br>(7.2)   | 776<br>(5.3)    | 888<br>(3.8)    | 986<br>(3.6)    | 418<br>(3.2)    | 296<br>(5.5)   | 694<br>(3.7)    | 874<br>(2.8)    | 943<br>(2.5)    | 392<br>(2.2)    | 190<br>(4.6)   | 464<br>(2.9)     | 575<br>(2.1)    | 579<br>(1.7)    | 242<br>(1.4)    |
| 1-59 months deaths (%)            | 603<br>(13.7)  | 1588<br>(10.8)  | 1820<br>(7.8)   | 1983<br>(7.2)   | 842<br>(6.5)    | 570<br>(10.6)  | 1407<br>(7.6)   | 1877<br>(6)     | 1873<br>(5.1)   | 764<br>(4.4)    | 370 (9)        | 881<br>(5.5)     | 1186<br>(4.4)   | 1241<br>(3.7)   | 517<br>(3)      |
| Under-5 deaths (%)                | 963<br>(21.9)  | 2399<br>(16.4)  | 2856<br>(12.3)  | 3090<br>(11.2)  | 1353<br>(10.5)  | 914<br>(17.1)  | 2331<br>(12.6)  | 3064<br>(9.8)   | 3174<br>(8.6)   | 1320<br>(7.6)   | 582<br>(14.2)  | 1571<br>(9.8)    | 2125<br>(7.8)   | 2235<br>(6.6)   | 1000<br>(5.9)   |
| Residency                         |                |                 |                 |                 |                 |                |                 |                 |                 |                 |                |                  |                 |                 |                 |
| Rural (% <sup>d</sup> )           | 3407<br>(77.4) | 10623<br>(72.6) | 16249<br>(69.9) | 18320<br>(66.2) | 7594<br>(58.7)  | 3941<br>(73.6) | 13299<br>(71.6) | 21969<br>(70.4) | 24444<br>(66)   | 10131<br>(58.1) | 3052<br>(73.4) | 12030<br>(73.2)  | 19655<br>(70.7) | 22688<br>(65.7) | 9813<br>(55.9)  |
| Urban (%)                         | 997<br>(22.6)  | 4016<br>(27.4)  | 7009<br>(30.1)  | 9368<br>(33.8)  | 5348<br>(41.3)  | 1415<br>(26.4) | 5270<br>(28.4)  | 9235<br>(29.6)  | 12618<br>(34)   | 7320<br>(41.9)  | 1105<br>(26.6) | 4399<br>(26.8)   | 8132<br>(29.3)  | 11838<br>(34.3) | 7731<br>(44.1)  |
| Maternal Education                |                |                 |                 |                 |                 |                |                 |                 |                 |                 |                |                  |                 |                 |                 |
| No education (%)                  | 2672<br>(60.7) | 7174<br>(49)    | 8907<br>(38.3)  | 9223<br>(33.3)  | 3977<br>(30.7)  | 2709<br>(50.6) | 7581<br>(40.8)  | 11129<br>(35.7) | 12489<br>(33.7) | 5640<br>(32.3)  | 1867<br>(44.9) | 6255<br>(38.1)   | 8710<br>(31.3)  | 9896<br>(28.7)  | 4734<br>(27)    |
| Any level of education (%)        | 1732<br>(39.3) | 7465<br>(51)    | 14351<br>(61.7) | 18465<br>(66.7) | 8965<br>(69.3)  | 2647<br>(49.4) | 10988<br>(59.2) | 20075<br>(64.3) | 24573<br>(66.3) | 11811<br>(67.7) | 2290<br>(55.1) | 101174<br>(61.9) | 19077<br>(68.7) | 24630<br>(71.3) | 12810<br>(73)   |

|                                                   | 2004-2008 |          |          |          |          | 2009-2013 |          |          |           |          | 2014-2018 |          |           |           |        |
|---------------------------------------------------|-----------|----------|----------|----------|----------|-----------|----------|----------|-----------|----------|-----------|----------|-----------|-----------|--------|
| Maternal age at first birth                       | < 16      | 16-17    | 18-19    | 20-22    | 23-25    | < 16      | 16-17    | 18-19    | 20-22     | 23-25    | < 16      | 16-17    | 18-19     | 20-22     | 23-25  |
| Marital Status                                    | 327       | 1378     | 2253     | 2479     | 1089     | 672       | 2677     | 3846     | 3913      | 1574     | 549       | 2187     | 3434      | 3845      | 1731   |
| Never in union (%)                                | (7.4)     | (9.4)    | (9.7)    | (9)      | (8.4)    | (12.5)    | (14.4)   | (12.3)   | (10.6)    | (9)      | (13.2)    | (13.3)   | (12.4)    | (11.1)    | (9.9)  |
| Currently/Formerly in union/living with a man (%) | 4077      | 13261    | 21004    | 25207    | 11853    | 4684      | 15891    | 27357    | 33148     | 15876    | 3608      | 14242    | 24353     | 30681     | 15813  |
|                                                   | (92.6)    | (90.6)   | (90.3)   | (91)     | (91.6)   | (87.5)    | (85.6)   | (87.7)   | (89.4)    | (91)     | (86.8)    | (86.7)   | (87.6)    | (88.9)    | (90.1) |
| Place of Delivery <sup>b</sup>                    | 797       | 3734     | 5372     | 5383     | 2160     | 667       | 3441     | 5140     | 4903      | 1968     | 562       | 3002     | 4200      | 3788      | 1510   |
| At home (%)                                       | (60.8)    | (53.5)   | (44.8)   | (38)     | (31.1)   | (40.8)    | (37.7)   | (31.5)   | (25.7)    | (20.8)   | (45.4)    | (37.9)   | (28.8)    | (21.4)    | (16.3) |
| Health facility (%)                               | 506       | 3208     | 6552     | 8679     | 4740     | 955       | 5625     | 11058    | 14045     | 7459     | 666       | 4856     | 10246     | 13733     | 7655   |
| Other (%)                                         | (38.6)    | (46)     | (54.6)   | (61.3)   | (68.2)   | (58.4)    | (61.7)   | (67.9)   | (73.6)    | (78.7)   | (53.8)    | (61.4)   | (70.3)    | (77.8)    | (82.7) |
|                                                   | 8 (0.6)   | 37 (0.5) | 69 (0.6) | 89 (0.6) | 53 (0.8) | 13 (0.8)  | 51 (0.6) | 94 (0.6) | 131 (0.7) | 56 (0.6) | 9 (0.7)   | 53 (0.7) | 125 (0.9) | 142 (0.8) | 90 (1) |
| Antenatal Care Visit <sup>b</sup>                 | 164       | 857      | 1149     | 959      | 366      | 153       | 638      | 944      | 807       | 347      | 139       | 662      | 880       | 707       | 323    |
| No visit (%)                                      | (24.4)    | (21.2)   | (15.5)   | (11.1)   | (8.6)    | (17.1)    | (11.8)   | (9.1)    | (6.7)     | (5.9)    | (20.2)    | (14)     | (9.3)     | (6.2)     | (5.4)  |
| 1+ visit (%)                                      | 508       | 3180     | 6273     | 7678     | 3881     | 740       | 4785     | 403      | 11155     | 5529     | 548       | 4079     | 8586      | 10682     | 5697   |
|                                                   | (75.6)    | (78.8)   | (84.5)   | (88.9)   | (91.4)   | (82.9)    | (88.2)   | (90.9)   | (93.3)    | (94.1)   | (79.8)    | (86)     | (90.7)    | (93.8)    | (94.6) |

<sup>a</sup> % births in the dataset (age-group distribution).

<sup>b</sup> Stillbirths, place of delivery and antenatal care utilization data were available for births that took place 3 or 5 years before the survey.

<sup>c</sup> % of cases that ended in death (crude mortality rate).

<sup>d</sup> % of cases belonging to subgroup (within-cell distribution).

Table 2. Characteristics of the study population for the child health outcomes in South Asia (Unweighted data). All numbers represent women's first birth out of their entire birth history, unless noted otherwise.

| Maternal age at first birth       | 2004-2008      |                |                 |                 |                 | 2009-2013     |                |                |                 |                | 2014-2018       |                 |                 |                 |                 |
|-----------------------------------|----------------|----------------|-----------------|-----------------|-----------------|---------------|----------------|----------------|-----------------|----------------|-----------------|-----------------|-----------------|-----------------|-----------------|
|                                   | < 16           | 16-17          | 18-19           | 20-22           | 23-25           | < 16          | 16-17          | 18-19          | 20-22           | 23-25          | < 16            | 16-17           | 18-19           | 20-22           | 23-25           |
| Total births (% <sup>a</sup> )    | 1835<br>(3.2)  | 7084<br>(12.5) | 13405<br>(23.6) | 21767<br>(38.3) | 12737<br>(22.4) | 729<br>(2.2)  | 3260<br>(9.7)  | 7161<br>(21.3) | 13352<br>(39.7) | 9131<br>(27.1) | 2674<br>(1.4)   | 13302<br>(6.7)  | 38819<br>(19.7) | 86902<br>(44.1) | 55522<br>(28.2) |
| Stillbirth (% <sup>b</sup> )      | 21<br>(3.3)    | 75<br>(2.2)    | 124<br>(1.4)    | 207<br>(0.9)    | 181<br>(0.8)    | 5 (2.1)       | 33<br>(2.1)    | 37<br>(0.8)    | 105<br>(0.9)    | 93<br>(0.7)    | 21<br>(3.1)     | 78<br>(1.4)     | 247<br>(1.1)    | 601<br>(0.8)    | 605<br>(0.7)    |
| Neonatal deaths (% <sup>c</sup> ) | 160<br>(8.7)   | 451<br>(6.4)   | 690<br>(5.1)    | 786<br>(3.6)    | 412<br>(3.2)    | 41<br>(5.6)   | 157<br>(4.8)   | 295<br>(4.1)   | 408<br>(3.1)    | 228<br>(2.5)   | 148<br>(5.5)    | 643<br>(4.8)    | 1552<br>(4)     | 2771<br>(3.2)   | 1514<br>(2.7)   |
| Infant deaths (%)                 | 220<br>(12)    | 647<br>(9.1)   | 976<br>(7.3)    | 1133<br>(5.2)   | 585<br>(4.6)    | 63<br>(8.6)   | 229<br>(7)     | 415<br>(5.8)   | 575<br>(4.3)    | 329<br>(3.6)   | 219<br>(8.2)    | 897<br>(6.7)    | 2078<br>(5.4)   | 3710<br>(4.3)   | 1964<br>(3.5)   |
| Child deaths (%)                  | 40<br>(2.2)    | 101<br>(1.4)   | 129<br>(1)      | 164<br>(0.8)    | 68<br>(0.5)     | 8 (1.1)       | 29<br>(0.9)    | 55<br>(0.8)    | 89 (0.7)        | 43<br>(0.5)    | 32<br>(1.2)     | 108<br>(0.8)    | 227<br>(0.6)    | 437<br>(0.5)    | 218<br>(0.4)    |
| 1-59 months deaths (%)            | 101<br>(5.5)   | 299<br>(4.2)   | 419<br>(3.1)    | 514<br>(2.4)    | 242<br>(1.9)    | 30<br>(4.1)   | 101<br>(3.1)   | 175<br>(2.4)   | 259<br>(1.9)    | 144<br>(1.6)   | 103<br>(3.9)    | 362<br>(2.7)    | 753<br>(1.9)    | 1377<br>(1.6)   | 670<br>(1.2)    |
| Under-5 deaths (%)                | 260<br>(14.2)  | 748<br>(10.6)  | 1105<br>(8.2)   | 1297<br>(6)     | 653<br>(5.1)    | 71<br>(9.7)   | 258<br>(7.9)   | 470<br>(6.6)   | 664 (5)         | 372<br>(4.1)   | 251<br>(9.4)    | 1005<br>(7.6)   | 2305<br>(5.9)   | 4147<br>(4.8)   | 2182<br>(3.9)   |
| Residency                         |                |                |                 |                 |                 |               |                |                |                 |                |                 |                 |                 |                 |                 |
| Rural (%) <sup>d</sup>            | 1335<br>(72.8) | 5088<br>(71.8) | 9139<br>(68.2)  | 13336<br>(61.3) | 6716<br>(52.7)  | 523<br>(71.7) | 2302<br>(70.6) | 4999<br>(69.8) | 8794<br>(65.9)  | 2054<br>(76.8) | 10047<br>(75.5) | 29711<br>(76.5) | 64977<br>(74.8) | 38311<br>(69)   | 2054<br>(76.8)  |
| Urban (%)                         | 500<br>(27.2)  | 1996<br>(28.2) | 4266<br>(31.8)  | 8431<br>(38.7)  | 6021<br>(47.3)  | 206<br>(28.3) | 958<br>(29.4)  | 2162<br>(30.2) | 4558<br>(34.1)  | 620<br>(23.2)  | 3255<br>(24.5)  | 9108<br>(23.5)  | 21925<br>(25.2) | 17211<br>(31)   | 620<br>(23.2)   |

| Maternal age at first birth                       | 2004-2008 |         |        |        |         | 2009-2013 |         |          |        |          | 2014-2018 |          |          |        |        |
|---------------------------------------------------|-----------|---------|--------|--------|---------|-----------|---------|----------|--------|----------|-----------|----------|----------|--------|--------|
|                                                   | < 16      | 16-17   | 18-19  | 20-22  | 23-25   | < 16      | 16-17   | 18-19    | 20-22  | 23-25    | < 16      | 16-17    | 18-19    | 20-22  | 23-25  |
| Maternal Education                                | 789       | 2724    | 4289   | 5180   | 2084    | 161       | 631     | 1274     | 1988   | 1125     | 933       | 4287     | 11204    | 21739  | 11502  |
| No education (%)                                  | (43)      | (38.5)  | (32)   | (23.8) | (16.4)  | (22.1)    | (19.4)  | (17.8)   | (14.9) | (12.3)   | (34.9)    | (32.2)   | (28.9)   | (25)   | (20.7) |
| Any level of education (%)                        | 1046      | 4360    | 9116   | 16587  | 10653   | 568       | 2629    | 5887     | 11364  | 8006     | 1741      | 9015     | 27615    | 65163  | 44020  |
|                                                   | (57)      | (61.5)  | (68)   | (76.2) | (83.6)  | (77.9)    | (80.6)  | (82.2)   | (85.1) | (87.7)   | (65.1)    | (67.8)   | (71.1)   | (75)   | (79.3) |
| Marital Status                                    | 1 (0.1)   | 13      | 29     | 58     | 35      | 1 (0.1)   | 19      | 47 (0.7) | 76     | 43 (0.5) | 12        | 59 (0.4) | 126      | 252    | 167    |
| Never in union (%)                                | 1834      | (0.2)   | (0.2)  | (0.3)  | (0.3)   | 728       | (0.6)   | 7114     | (0.6)  | 9088     | (0.4)     | 13243    | (0.3)    | (0.3)  | (0.3)  |
| Currently/Formerly in union/living with a man (%) | (99.9)    | 7071    | 13376  | 21709  | 12702   | (99.9)    | 3241    | (99.3)   | 13276  | (99.5)   | 2662      | (99.6)   | 38693    | 86650  | 55355  |
|                                                   |           | (99.8)  | (99.8) | (99.7) | (99.7)  |           | (99.4)  |          | (99.4) |          | (99.6)    |          | (99.7)   | (99.7) | (99.7) |
| Place of Delivery b                               | 463       | 2111    | 4029   | 5878   | 2593    | 155       | 923     | 1939     | 2921   | 1692     | 225       | 1533     | 4406     | 8332   | 4350   |
| At home (%)                                       | (79.1)    | (74.1)  | (64.1) | (52.3) | (38.5)  | (73.5)    | (66.1)  | (55.2)   | (42.4) | (33.5)   | (48.2)    | (35.2)   | (26)     | (18.9) | (14.3) |
| Health facility (%)                               | 120       | 731     | 2232   | 5328   | 4136    | 56        | 471     | 1564     | 3931   | 3333     | 239       | 2810     | 12462    | 35723  | 25892  |
| Other (%)                                         | (20.5)    | (25.7)  | (35.5) | (47.4) | (61.4)  | (26.5)    | (33.7)  | (44.5)   | (57.1) | (66.1)   | (51.2)    | (64.4)   | (73.6)   | (80.9) | (85.3) |
|                                                   | 2 (0.3)   | 7 (0.2) | 20     | 28     | 7 (0.1) | 0 (0)     | 3 (0.2) | 9 (0.3)  | 32     | 20 (0.4) | 3 (0.6)   | 18 (0.4) | 60 (0.4) | 123    | 114    |
|                                                   |           |         | (0.3)  | (0.2)  |         |           |         |          | (0.5)  |          |           |          |          | (0.3)  | (0.4)  |
| Antenatal Care Visit b                            | 104       | 462     | 683    | 806    | 308     | 42        | 196     | 304      | 346    | 171      | 62        | 452      | 1613     | 3235   | 1830   |
| No visit (%)                                      | (32.2)    | (26.8)  | (17.5) | (11)   | (6.7)   | (29)      | (20.1)  | (12.5)   | (7.1)  | (4.7)    | (22.5)    | (17.6)   | (16.1)   | (12.1) | (9.2)  |
| 1+ visit (%)                                      | 219       | 1264    | 3216   | 6537   | 4307    | 103       | 780     | 2129     | 4504   | 3431     | 213       | 2120     | 8434     | 23503  | 18135  |
|                                                   | (67.8)    | (73.2)  | (82.5) | (89)   | (93.3)  | (71)      | (79.9)  | (87.5)   | (92.9) | (95.3)   | (77.5)    | (82.4)   | (83.9)   | (87.9) | (90.8) |

<sup>a</sup> % births in the dataset (age-group distribution).

<sup>b</sup> Stillbirths, place of delivery and antenatal care utilization data and were available for births taking place 3 or 5 years before the survey."

<sup>c</sup> % of cases that ended in death (crude mortality rate).

<sup>d</sup> % of cases belonging to subgroup (within-cell distribution).

Table 3. Child and 1-59 months mortality rates and their sampling errors in SSA

|                                                              | 2004-2008        |                     | 2009-2013   |              | 2014-2018  |             |
|--------------------------------------------------------------|------------------|---------------------|-------------|--------------|------------|-------------|
|                                                              | CMR <sup>a</sup> | 1-59MR <sup>b</sup> | CMR         | 1-59MR       | CMR        | 1-59MR      |
| <b>Maternal age at first birth (years)</b>                   |                  |                     |             |              |            |             |
| < 16                                                         | 101.2±5.2        | 153.4±6.0           | 77.6±4.4    | 122.5±5.2    | 67 ± 4.5   | 101.9 ± 5.3 |
| 16-17                                                        | 82.0±2.9         | 130±3.4             | 59.3±2.2    | 95.4±2.6     | 43.4 ± 2   | 68.4 ± 2.5  |
| 18-19                                                        | 62.6±2.1         | 99.1±2.4            | 45.0±1.6    | 76.4±1.9     | 32 ± 1.4   | 53.8 ± 1.8  |
| 20-22                                                        | 52.2±1.8         | 87.4±2.2            | 38.6±1.3    | 62.8±1.6     | 25.5 ± 1.1 | 44.8 ± 1.4  |
| 23-25                                                        | 52.9±2.6         | 83.3±3.2            | 35.1±1.8    | 55.2±2.2     | 21.2 ± 1.5 | 36.7 ± 1.8  |
| <b>Urban/Rural Residency</b>                                 |                  |                     |             |              |            |             |
| < 16                                                         | 75.8 ± 7.6       | 129.4 ± 8           | 57.1±2.7    | 100.8±5.9    | 45.1 ± 3.2 | 72.7 ± 8.8  |
|                                                              | 107.7 ± 3.4      | 159.3 ± 4.4         | 85.1±3.8    | 130.3±3.5    | 75 ± 0.6   | 112.3 ± 4.7 |
| 16-17                                                        | 69.6 ± 1         | 110.3 ± 1.6         | 38.9±1.3    | 69.9±1.4     | 30.1 ± 0.9 | 51.6 ± 6.2  |
|                                                              | 86 ± 8.2         | 136.1 ± 7.4         | 68.1±2.4    | 105.8±2.4    | 48.7 ± 0.9 | 74.9 ± 1.3  |
| 18-19                                                        | 47.7 ± 1         | 80 ± 1.7            | 29.7±2.6    | 54.3±2.6     | 23.3 ± 1   | 41.6 ± 2.9  |
|                                                              | 68.3 ± 2         | 106.2 ± 2.4         | 52.4±2.7    | 86.8±3.7     | 35.9 ± 1.5 | 59.2 ± 1.4  |
| 20-22                                                        | 36.8 ± 2.1       | 65.2 ± 1.7          | 24.6±1.4    | 42.2±1.4     | 17.3 ± 5.1 | 32.4 ± 4.6  |
|                                                              | 59.1 ± 1.9       | 97.2 ± 2.2          | 46.6±3.6    | 74.3±4.6     | 30.3 ± 0.4 | 51.8 ± 0.6  |
| 23-25                                                        | 28 ± 0.3         | 53 ± 2              | 25.7±0.9    | 40.0±1.2     | 15.5 ± 0.3 | 27.8 ± 0.5  |
|                                                              | 67.7 ± 3.9       | 101 ± 3.8           | 42.3±3.3    | 67.0±3.2     | 26.1 ± 0.2 | 44.5 ± 0.4  |
| <b>Maternal Education Status: Any Education/No Education</b> |                  |                     |             |              |            |             |
| < 16                                                         | 69.3 ± 0.8       | 115.8 ± 1.1         | 64.4 ± 1.3  | 110.3 ± 2.5  | 52.3 ± 2.5 | 85 ± 6      |
|                                                              | 121.5 ± 5.1      | 176.3 ± 6.7         | 87.6 ± 4.7  | 131.5 ± 4.9  | 83.6 ± 1.1 | 121.1 ± 6.7 |
| 16-17                                                        | 57.2 ± 0.5       | 98.5 ± 0.8          | 47.9 ± 0.5  | 79.5 ± 0.8   | 32.7 ± 0.5 | 57 ± 3.8    |
|                                                              | 106.1 ± 10.9     | 159.8 ± 9.2         | 72.7 ± 3.6  | 114.4 ± 3.4  | 59.8 ± 0.9 | 85.7 ± 1.1  |
| 18-19                                                        | 46.9 ± 0.5       | 80.1 ± 0.9          | 34.9 ± 1.9  | 63.5 ± 3.8   | 25.4 ± 0.8 | 44.9 ± 1.3  |
|                                                              | 86.6 ± 2.1       | 127.4 ± 3.2         | 60.9 ± 4.2  | 97 ± 5.2     | 45.5 ± 3   | 72.4 ± 2.8  |
| 20-22                                                        | 39 ± 0.2         | 69 ± 0.4            | 29.8 ± 2    | 51.8 ± 1.9   | 21 ± 0.5   | 37.3 ± 0.9  |
|                                                              | 78 ± 3.5         | 122.2 ± 3.7         | 53.8 ± 5.7  | 82 ± 7.7     | 36 ± 0.3   | 62.8 ± 0.6  |
| 23-25                                                        | 39.6 ± 0.3       | 67 ± 0.6            | 28.3 ± 0.2  | 46 ± 0.3     | 16.4 ± 0.3 | 30.6 ± 0.5  |
|                                                              | 81.5 ± 6.6       | 117.7 ± 6.4         | 47.5 ± 5.4  | 72.5 ± 5.3   | 33.8 ± 0.1 | 53.2 ± 0.2  |
| <b>Antenatal Care Visit (ANC): Any Visit/No Visit</b>        |                  |                     |             |              |            |             |
| < 16                                                         | 116.9 ± 13.8     | 153.9 ± 13.9        | 51.7 ± 24.4 | 82.6 ± 26.1  | -          | -           |
|                                                              | 93 ± 14.7        | 102.7 ± 14.4        | 99.2 ± 48.1 | 127.2 ± 43.8 | -          | -           |
| 16-17                                                        | 36.2 ± 11.6      | 67.2 ± 11           | 43.7 ± 1.1  | 68.3 ± 1.5   | 26.1 ± 0.4 | 40.6 ± 0.7  |
|                                                              | 87.8 ± 5.3       | 115.7 ± 11.4        | 33.7 ± 1.7  | 67.1 ± 3     | 67.2 ± 3.3 | 100 ± 4     |
| 18-19                                                        | 33.9 ± 1.2       | 55.1 ± 1.7          | 42.1 ± 0.4  | 64.2 ± 3.6   | 21 ± 0.6   | 33 ± 0.9    |
|                                                              | 60 ± 0.7         | 91.8 ± 2            | 123.4 ± 8.3 | 139.6 ± 10.6 | 43.8 ± 1.7 | 65.6 ± 2.2  |
| 20-22                                                        | 30.2 ± 0.5       | 54.4 ± 0.8          | 19.5 ± 0.2  | 37.2 ± 0.5   | 11.1 ± 0.2 | 22.3 ± 0.3  |
|                                                              | 117.2 ± 17.8     | 153.9 ± 17.4        | 81.6 ± 9.8  | 93.9 ± 13.7  | 47.2 ± 2.2 | 82.6 ± 2.9  |
| 23-25                                                        | 32 ± 0.7         | 56.6 ± 1.3          | 29.8 ± 0.2  | 44.1 ± 0.3   | 9.4 ± 0.6  | 17.7 ± 0.8  |
|                                                              | 93.1 ± 259.9     | 107.5 ± 248.8       | 19 ± 1.3    | 42.5 ± 2.6   | 46.2 ± 6.1 | 80.8 ± 8.8  |



|                                            | 2004-2008    |             | 2009-2013   |             | 2014-2018   |             |
|--------------------------------------------|--------------|-------------|-------------|-------------|-------------|-------------|
|                                            | CMR          | 1-59MR      | CMR         | 1-59MR      | CMR         | 1-59MR      |
| Place of Delivery: At Home/Health Facility |              |             |             |             |             |             |
| < 16                                       | 109.8 ± 6.1  | 165.1 ± 6.9 | 110.2 ± 8.5 | 148.7 ± 9.2 | 122.6 ± 1.5 | 162.3 ± 5.1 |
|                                            | 104.5 ± 28.2 | 129 ± 28.4  | 69.8 ± 0.6  | 99.6 ± 9.3  | 66.6 ± 3.9  | 98.9 ± 11.3 |
| 16-17                                      | 88.4 ± 3.6   | 133.6 ± 4.2 | 72.3 ± 3.6  | 99.7 ± 4    | 76.3 ± 1.8  | 99.7 ± 2.1  |
|                                            | 54.3 ± 8.9   | 96.5 ± 8.2  | 50.1 ± 1.6  | 81.8 ± 2.1  | 33.4 ± 0.3  | 56.9 ± 0.9  |
| 18-19                                      | 61.8 ± 6.2   | 102.1 ± 5.7 | 57.7 ± 2.1  | 90.6 ± 2.9  | 48 ± 0.4    | 75.9 ± 1.5  |
|                                            | 38.3 ± 1.2   | 65.8 ± 1.9  | 36.8 ± 0.9  | 62.2 ± 1.2  | 22.4 ± 0.9  | 37.3 ± 1.1  |
| 20-22                                      | 56.6 ± 1.6   | 98.3 ± 2.2  | 42.6 ± 2.1  | 66.2 ± 2.8  | 36.9 ± 1    | 66.6 ± 1.7  |
|                                            | 38 ± 0.7     | 67.5 ± 1.2  | 27.8 ± 0.8  | 48.5 ± 1.2  | 15.2 ± 0.1  | 30.3 ± 0.2  |
| 23-25                                      | 62.2 ± 2.4   | 94.7 ± 5.4  | 38.6 ± 23.7 | 66.3 ± 21.8 | 27.5 ± 1.4  | 49.1 ± 2.1  |
|                                            | 39.4 ± 0.8   | 65.5 ± 1.2  | 28.7 ± 0    | 44.5 ± 0.1  | 12.8 ± 0.4  | 24.1 ± 0.6  |

<sup>a</sup>CMR: Child mortality rate, <sup>b</sup>1-59MR: 1-59 months mortality rate

Table 4. Child and 1-59 months mortality rates and their sampling errors in South Asia

|                                                       | 2004-2008                |                          | 2009-2013                |                           | 2014-2018                |                           |
|-------------------------------------------------------|--------------------------|--------------------------|--------------------------|---------------------------|--------------------------|---------------------------|
|                                                       | CMR                      | 1-59MR                   | CMR                      | 1-59MR                    | CMR                      | 1-59MR                    |
| Maternal age at first birth (years)                   |                          |                          |                          |                           |                          |                           |
| < 16                                                  | 36.5 ± 0.6               | 62.1 ± 1                 | 18.8 ± 6.8               | 43.6 ± 6.2                | 12.4 ± 2.6               | 36 ± 7.8                  |
| 16-17                                                 | 19.2 ± 0.3               | 46.6 ± 2.6               | 12.8 ± 0.3               | 36 ± 2.6                  | 10.3 ± 0.7               | 27.6 ± 2                  |
| 18-19                                                 | 13.1 ± 0.2               | 33.3 ± 0.9               | 10 ± 2                   | 25.3 ± 1.9                | 7.8 ± 5.5                | 20 ± 5.1                  |
| 20-22                                                 | 11.1 ± 0.1               | 27.3 ± 0.2               | 8.3 ± 0.1                | 21.1 ± 0.2                | 6.6 ± 0.2                | 16.9 ± 0.5                |
| 23-25                                                 | 8.3 ± 0.1                | 22 ± 0.2                 | 9 ± 0.04                 | 19.8 ± 0.3                | 6.6 ± 0.2                | 14.4 ± 1.7                |
| Urban/Rural Residency                                 |                          |                          |                          |                           |                          |                           |
| < 16                                                  | 27.7 ± 1.2<br>38.3 ± 0.6 | 51.8 ± 2.3<br>64.2 ± 1   | 24.5 ± 1.1<br>17 ± 7.3   | 37.7 ± 10.8<br>45.3 ± 6.7 | 5.6 ± 2.4<br>14.5 ± 0.7  | 20.7 ± 10.6<br>40.6 ± 3.2 |
| 16-17                                                 | 16.9 ± 5.8<br>19.8 ± 0.3 | 36 ± 4.8<br>49.1 ± 2.5   | 7 ± 1.2<br>14.4 ± 0.5    | 26.1 ± 4.3<br>38.8 ± 2.6  | 10.6 ± 1.5<br>10.2 ± 7.9 | 27.2 ± 4.1<br>27.7 ± 7.5  |
| 18-19                                                 | 8.1 ± 0.1<br>14.8 ± 0.2  | 24.5 ± 0.2<br>36.2 ± 1   | 4.8 ± 1.7<br>11.7 ± 2.5  | 21.6 ± 2.2<br>26.5 ± 2.3  | 5.5 ± 11<br>8.6 ± 0.3    | 15.4 ± 10.4<br>21.6 ± 0.9 |
| 20-22                                                 | 5.8 ± 0.1<br>13.6 ± 0.1  | 17 ± 0.2<br>32 ± 0.3     | 5.1 ± 0.7<br>10 ± 0.1    | 13.8 ± 0.6<br>24.7 ± 0.2  | 4.1 ± 0.2<br>7.7 ± 0.1   | 12 ± 0.7<br>19 ± 1.1      |
| 23-25                                                 | 6.5 ± 0<br>9.7 ± 0.1     | 16.4 ± 0.1<br>26 ± 0.2   | 7.1 ± 0.1<br>10.4 ± 0.1  | 16.4 ± 0.5<br>22.1 ± 0.1  | 5 ± 0.2<br>7.5 ± 0.2     | 10.3 ± 2.5<br>16.8 ± 0.3  |
| Maternal Education Status: Any Education/No Education |                          |                          |                          |                           |                          |                           |
| < 16                                                  | 27.7 ± 0.7<br>44.8 ± 0.5 | 52.6 ± 1.3<br>70.8 ± 0.4 | 21.2 ± 7.8<br>11.9 ± 0.4 | 39.6 ± 7.2<br>59.3 ± 2.3  | 11.2 ± 2.3<br>14.2 ± 3   | 28.8 ± 6.4<br>49.4 ± 8.6  |
| 16-17                                                 | 12.4 ± 0.2<br>26.9 ± 0.3 | 35.7 ± 0.7<br>59.4 ± 5.4 | 7.4 ± 0.2<br>31.9 ± 0.6  | 27.7 ± 3<br>66 ± 1        | 8 ± 0.5<br>14.7 ± 1.5    | 22.9 ± 1.6<br>37.5 ± 4.1  |
| 18-19                                                 | 9.7 ± 0.2<br>18.3 ± 0.2  | 26.4 ± 1.3<br>44.3 ± 0.4 | 9.5 ± 2.4<br>12.3 ± 0.1  | 21.7 ± 2.2<br>41 ± 0.4    | 6.2 ± 7.9<br>11.4 ± 0.9  | 16.2 ± 7.4<br>29.7 ± 2.6  |
| 20-22                                                 | 7.6 ± 0.1<br>20.1 ± 3.4  | 21.1 ± 0.2<br>43 ± 3.1   | 7.3 ± 0.1<br>13.8 ± 0.1  | 19.1 ± 0.2<br>32 ± 0.2    | 5 ± 0.1<br>11.1 ± 0.5    | 13.4 ± 0.4<br>27.5 ± 1.2  |
| 23-25                                                 | 6.7 ± 0.1<br>14.8 ± 0    | 16.8 ± 0.1<br>43.4 ± 0.2 | 7.7 ± 0<br>17.8 ± 0.3    | 16.8 ± 0.4<br>39.4 ± 0.5  | 5.2 ± 0.1<br>11 ± 0.8    | 11 ± 0.1<br>26.7 ± 6.2    |
| Antenatal Care Visit (ANC): Any Visit/No Visit        |                          |                          |                          |                           |                          |                           |
| < 16                                                  | 11.4 ± 0.5<br>2.2 ± 0.2  | 43.7 ± 1.6<br>3.5 ± 0.3  | -                        | -                         | 27.3 ± 6.1<br>0 ± 0      | 26.5 ± 5.8<br>0 ± 0       |

|                                            | 2004-2008                |                          | 2009-2013               |                           | 2014-2018                |                           |
|--------------------------------------------|--------------------------|--------------------------|-------------------------|---------------------------|--------------------------|---------------------------|
|                                            | CMR                      | 1-59MMR                  | CMR                     | 1-59MR                    | CMR                      | 1-59MR                    |
| 16-17                                      | 17.8 ± 0.7<br>5 ± 0.2    | 29.6 ± 0.9<br>40.7 ±     | 3.4 ± 7.2<br>7.4 ± 0.7  | 7.8 ± 7<br>12.1 ± 4.9     | 2.6 ± 0.3<br>17.1 ± 2    | 9.4 ± 1.1<br>43.2 ± 4.1   |
| 18-19                                      | 4.9 ± 0.1<br>3.2 ± 0.1   | 13.5 ± 0.2<br>9.1 ± 8    | 2.9 ± 0.1<br>8.6 ± 0.5  | 7.1 ± 0.2<br>27.1 ± 1.1   | 2.4 ± 0.2<br>5.8 ± 0.7   | 9.5 ± 0.7<br>26.4 ± 2.1   |
| 20-22                                      | 5 ± 0<br>24 ± 1          | 13 ± 0.1<br>36.9 ± 1.3   | 1.5 ± 0<br>1.5 ± 5.6    | 4.6 ± 0.1<br>15.2 ± 5.4   | 3 ± 0.1<br>8.5 ± 0.5     | 9.2 ± 0.4<br>20.1 ± 2.4   |
| 23-25                                      | 0.6 ± 0<br>7.9 ± 0.8     | 6.5 ± 0.1<br>32.4 ± 2    | 6.5 ± 0.1<br>0 ± 0      | 13 ± 0.7<br>5.7 ± 0.7     | 3.7 ± 0<br>9.2 ± 0.3     | 8.3 ± 0.2<br>34.2 ± 1.1   |
| Place of Delivery: At Home/Health Facility |                          |                          |                         |                           |                          |                           |
| < 16                                       | 36.5 ± 2<br>0 ± 0        | 63.4 ± 2.9<br>35.2 ± 2.7 | 15.9 ± 37.9<br>0 ± 0    | 22.2 ± 36.4<br>24.9 ± 2.6 | 36.1 ± 4.4<br>71.1 ± 6.8 | 58.8 ± 11.6<br>85.3 ± 6.9 |
| 16-17                                      | 13.3 ± 0.2<br>11.7 ± 0.3 | 42.8 ± 5.1<br>32.4 ± 0.9 | 8.7 ± 0.1<br>10.2 ± 0.4 | 28 ± 0.4<br>9.8 ± 0.4     | 8.5 ± 0.4<br>11.1 ± 2.2  | 34.3 ± 2.3<br>25.7 ± 3.2  |
| 18-19                                      | 20.6 ± 0.2<br>7.2 ± 0.1  | 38.6 ± 3.5<br>19.6 ± 0.3 | 10.8 ± 7.2<br>5.5 ± 0.2 | 20.2 ± 6.7<br>13.7 ± 0.5  | 6.1 ± 0.2<br>5.8 ± 0.7   | 26.7 ± 1.4<br>17.3 ± 1.7  |
| 20-22                                      | 18.1 ± 4<br>5 ± 0.1      | 34.7 ± 3.6<br>13 ± 0.1   | 8.5 ± 0.2<br>5.9 ± 0    | 19.2 ± 0.3<br>12 ± 0.1    | 19.4 ± 4.2<br>6.8 ± 0.5  | 33.1 ± 5.4<br>16.5 ± 1.1  |
| 23-25                                      | 9.1 ± 0.1<br>5.3 ± 0.1   | 29.7 ± 0.3<br>12.5 ± 0.2 | 10.8 ± 0.2<br>6.2 ± 0   | 24.6 ± 0.5<br>14 ± 1.5    | 16.1 ± 0.8<br>7.1 ± 0.3  | 30.8 ± 9.4<br>13.8 ± 0.6  |

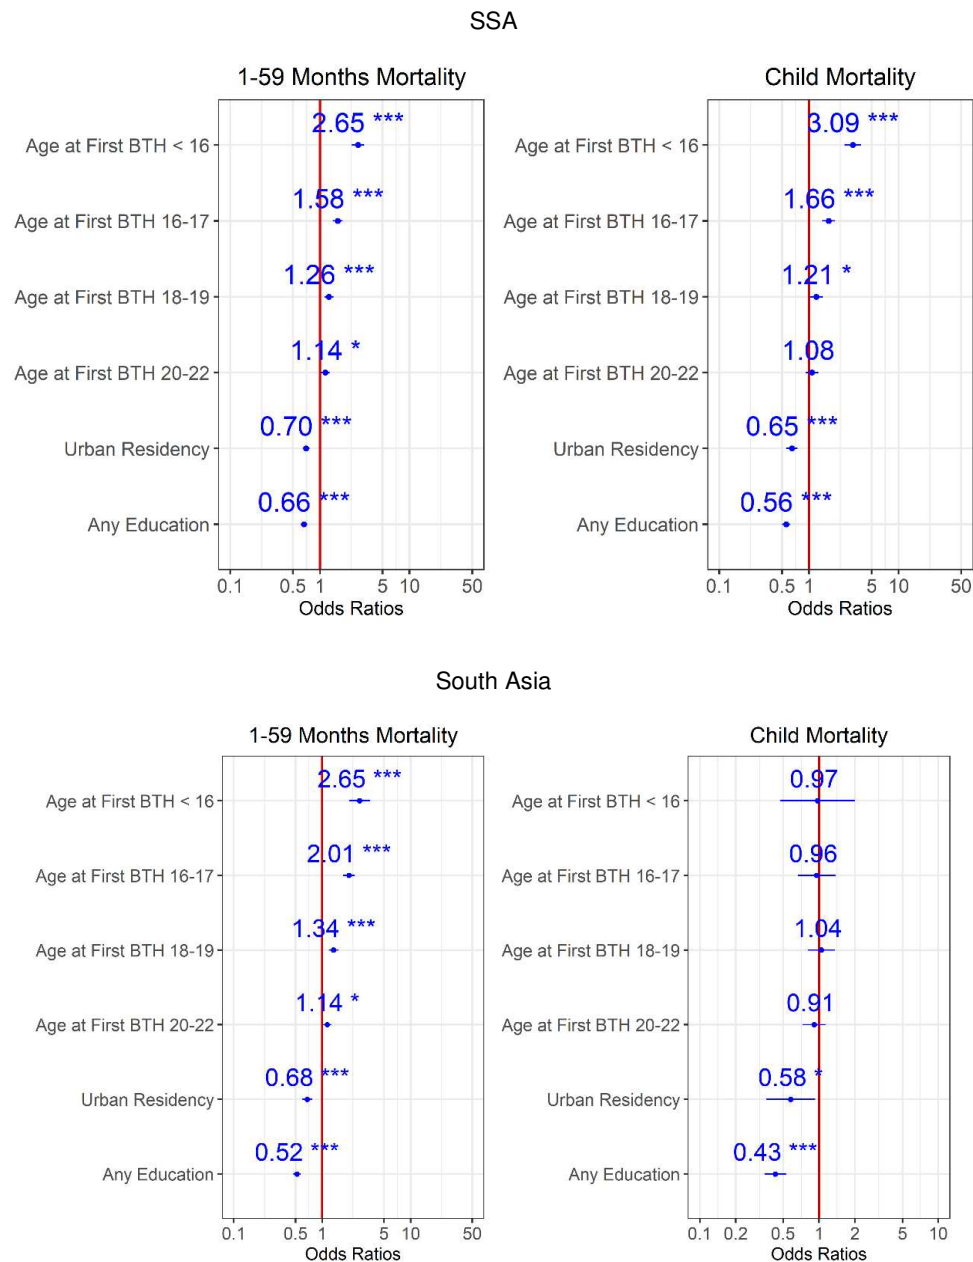

Figure 1. Ratios associated with 1-59 months and child mortality in SSA and South Asia for the 2014-2018 survey period. Risk factors reducing the probability of death have odds ratios lower than 1 to the left of the vertical red line. Odds ratios (blue points), 95% confidence intervals (horizontal blue lines) are given. P-values are shown with the asterisk signs ('\*\*\*' 0.001 '\*\*' 0.01 '\*' 0.05 '.' 0.1 '.' 1). Reference group is mothers aged 23-25 years old who live in rural areas and have no formal education (Model 1).

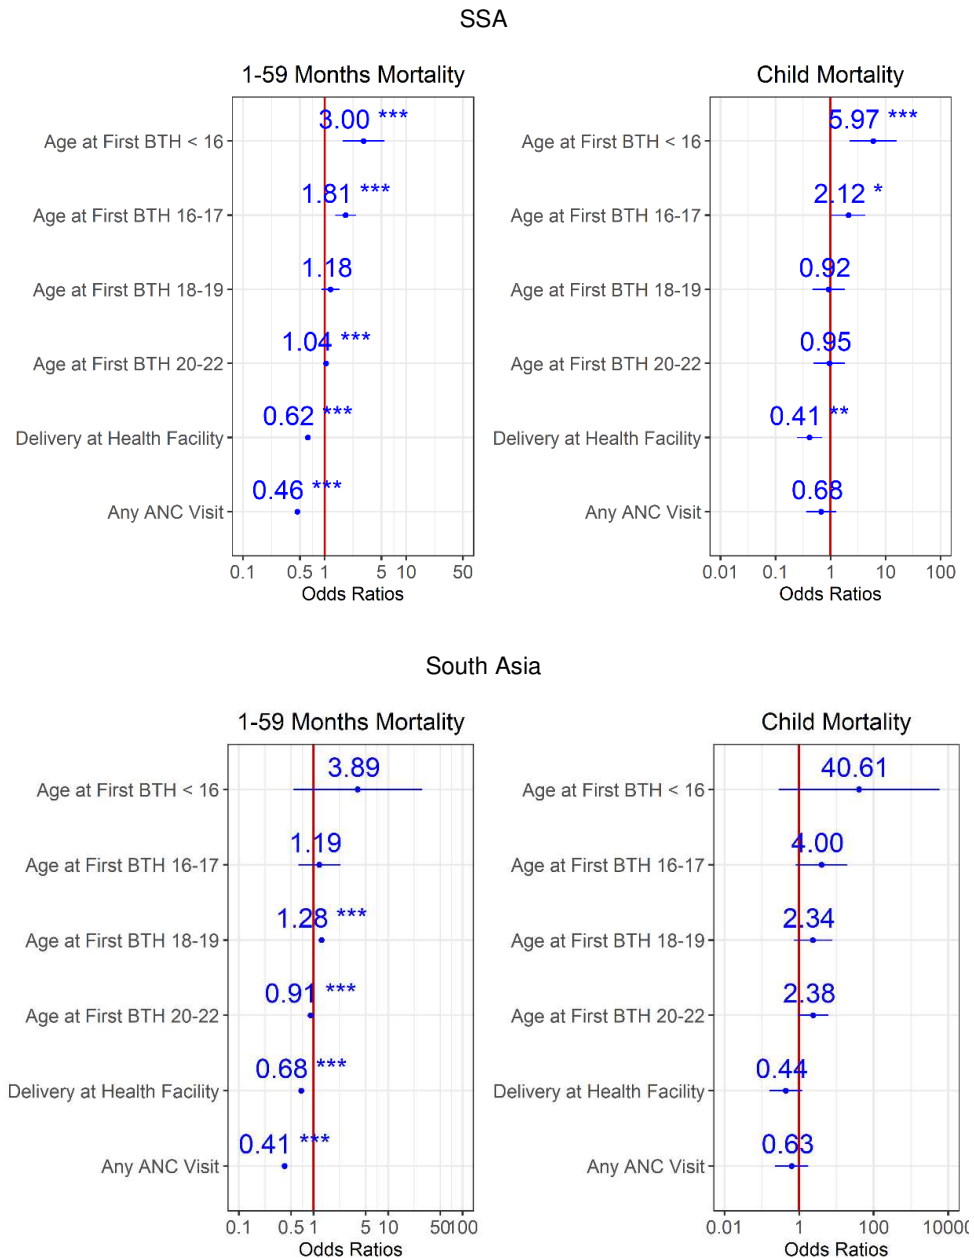

Figure 2. Ratios associated with 1-59 months and child mortality in SSA and South Asia for the 2014-2018 survey period. Risk factors reducing the probability of death have odds ratios lower than 1 to the left of the vertical red line. Odds ratios (blue points), 95% confidence intervals (horizontal blue lines) are given. P-values are shown with the asterisk signs (‘\*\*\*’ 0.001 ‘\*\*’ 0.01 ‘\*’ 0.05 ‘.’ 0.1 ‘ ’ 1). Reference group is mothers aged 23-25 years old who delivered at home, and had no ANC visit (Model 2).

## SSA

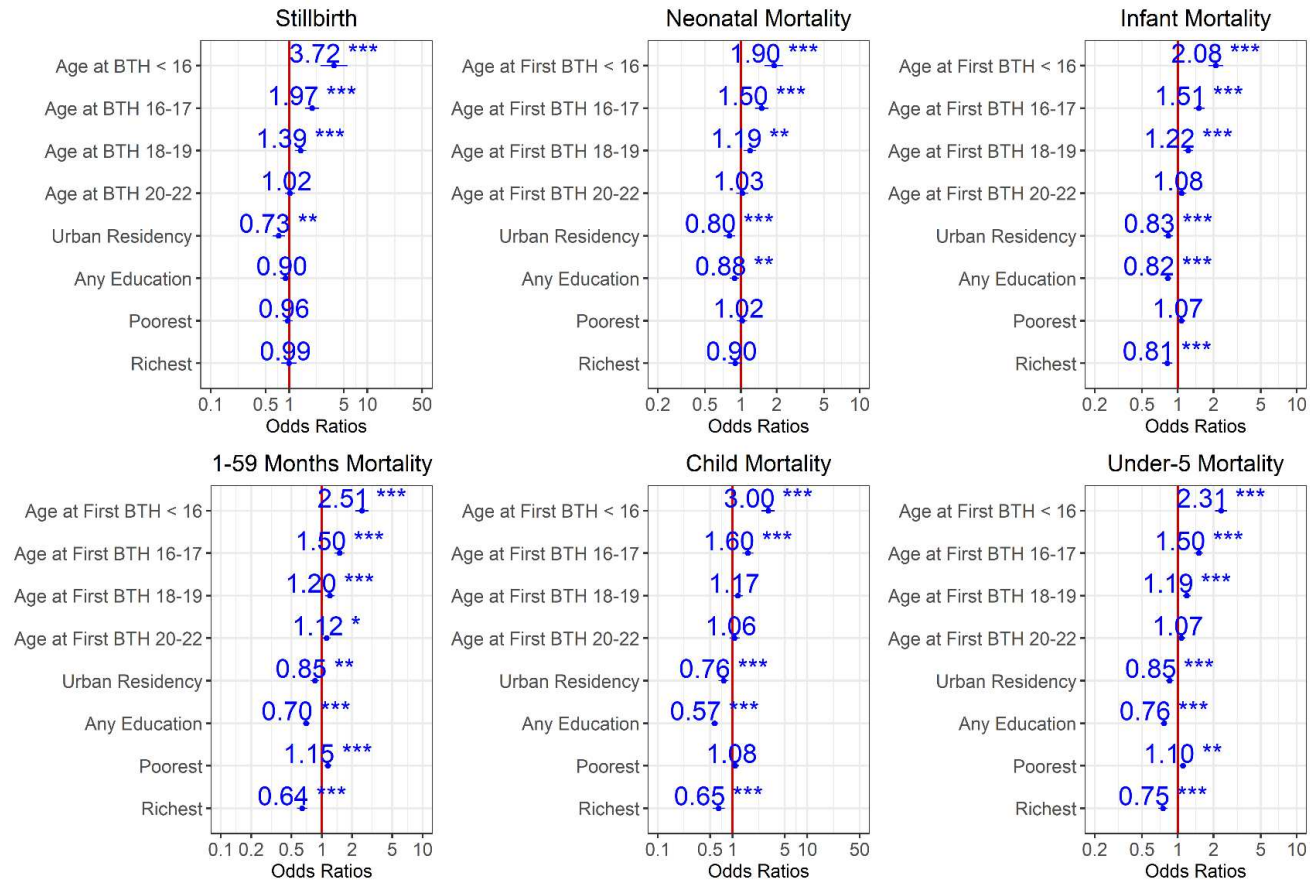

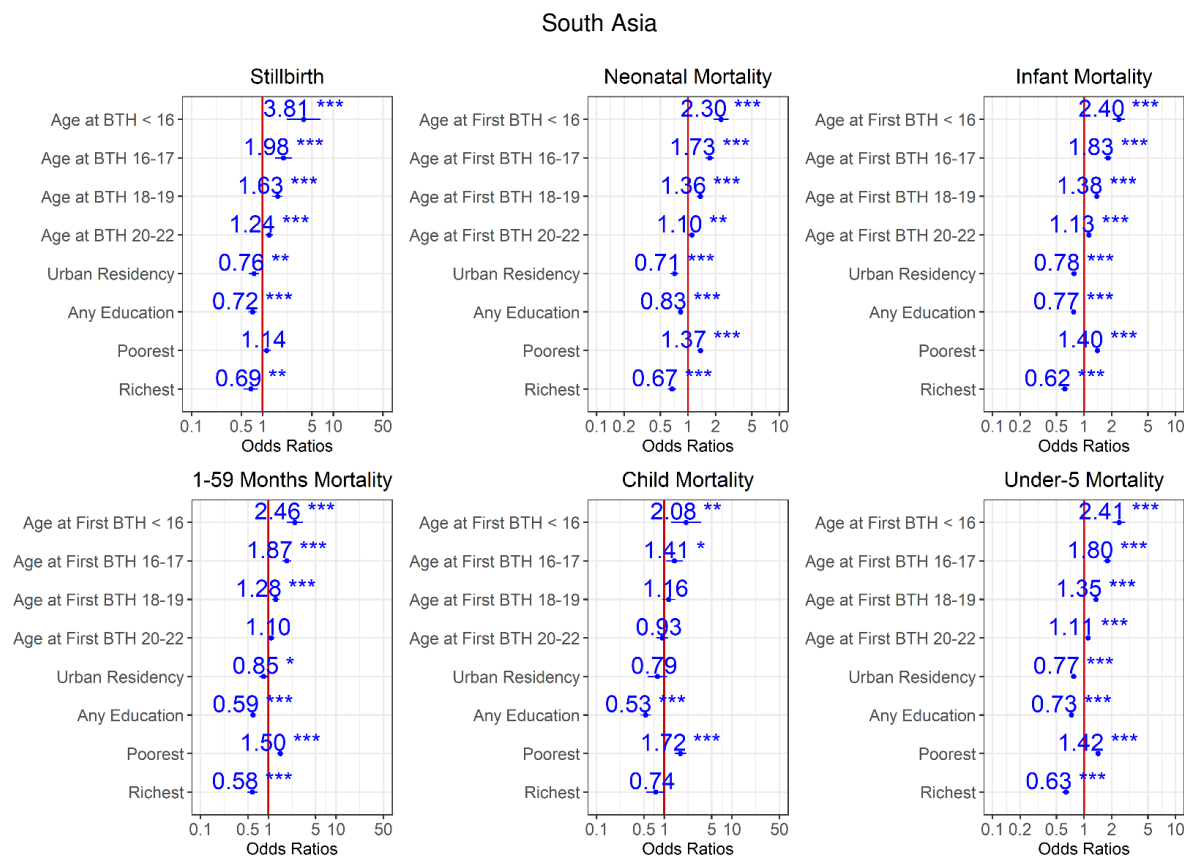

Figure 3. Ratios associated with neonate, infant, child, 1-59 months, under-5 years, and stillbirth in SSA and South Asia for the 2014-2018 survey period. Risk factors reducing the probability of death have odds ratios lower than 1 to the left of the vertical red line. Odds ratios (blue points), 95% confidence intervals (horizontal blue lines) are given. P-values are shown with the asterisk signs (‘\*\*\*’ 0.001 ‘\*\*’ 0.01 ‘\*’ 0.05 ‘.’ 0.1 ‘ ’ 1). Reference group is mothers aged 23-25 years old who live in rural areas, have no formal education, and are in the poorer/middle/richer wealth quintile (Model 3).

SSA

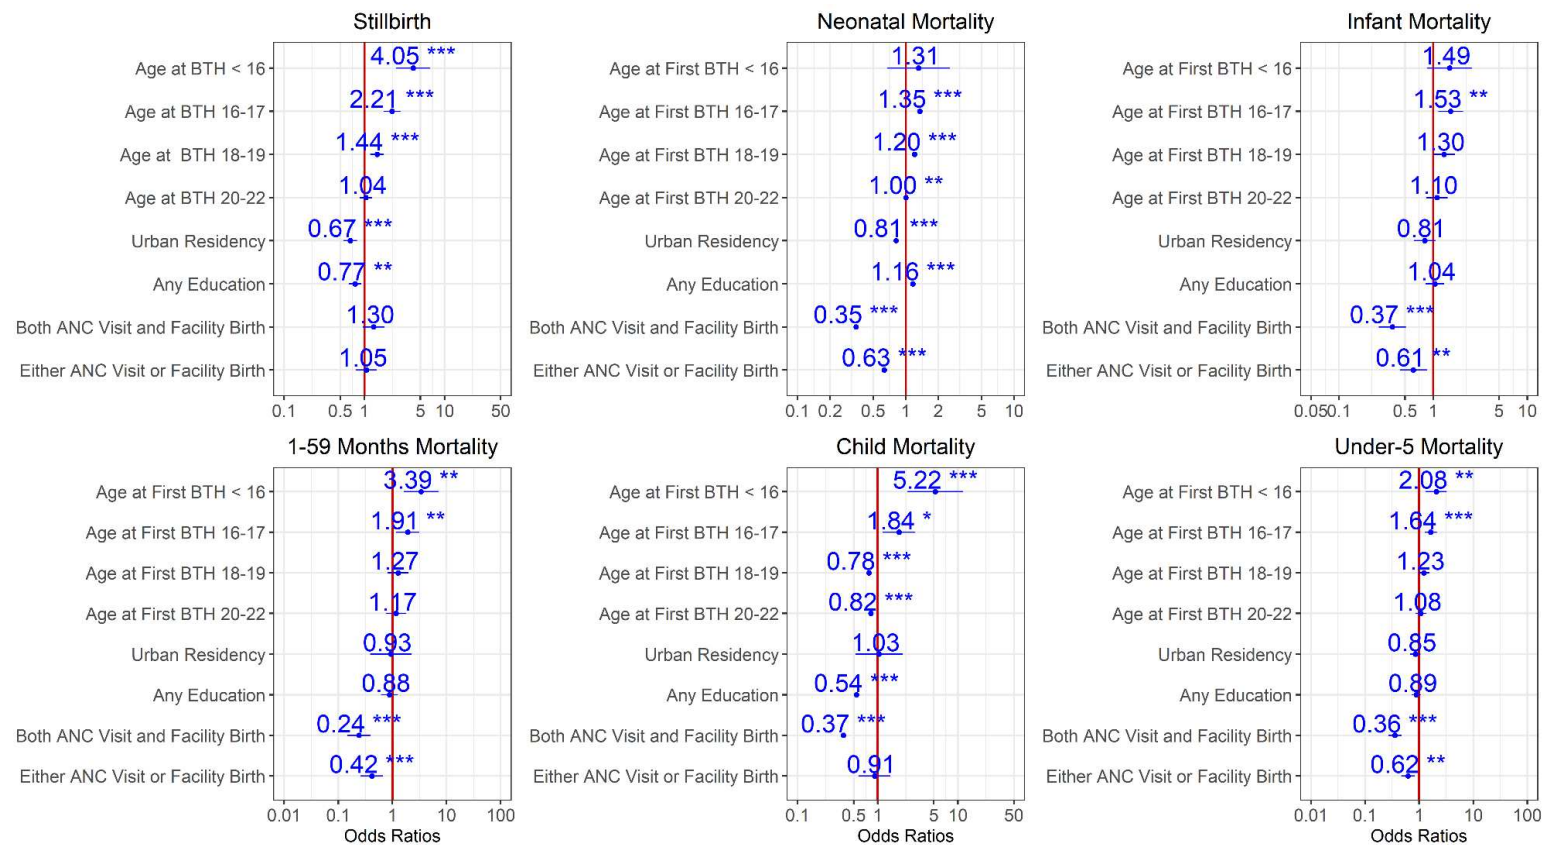



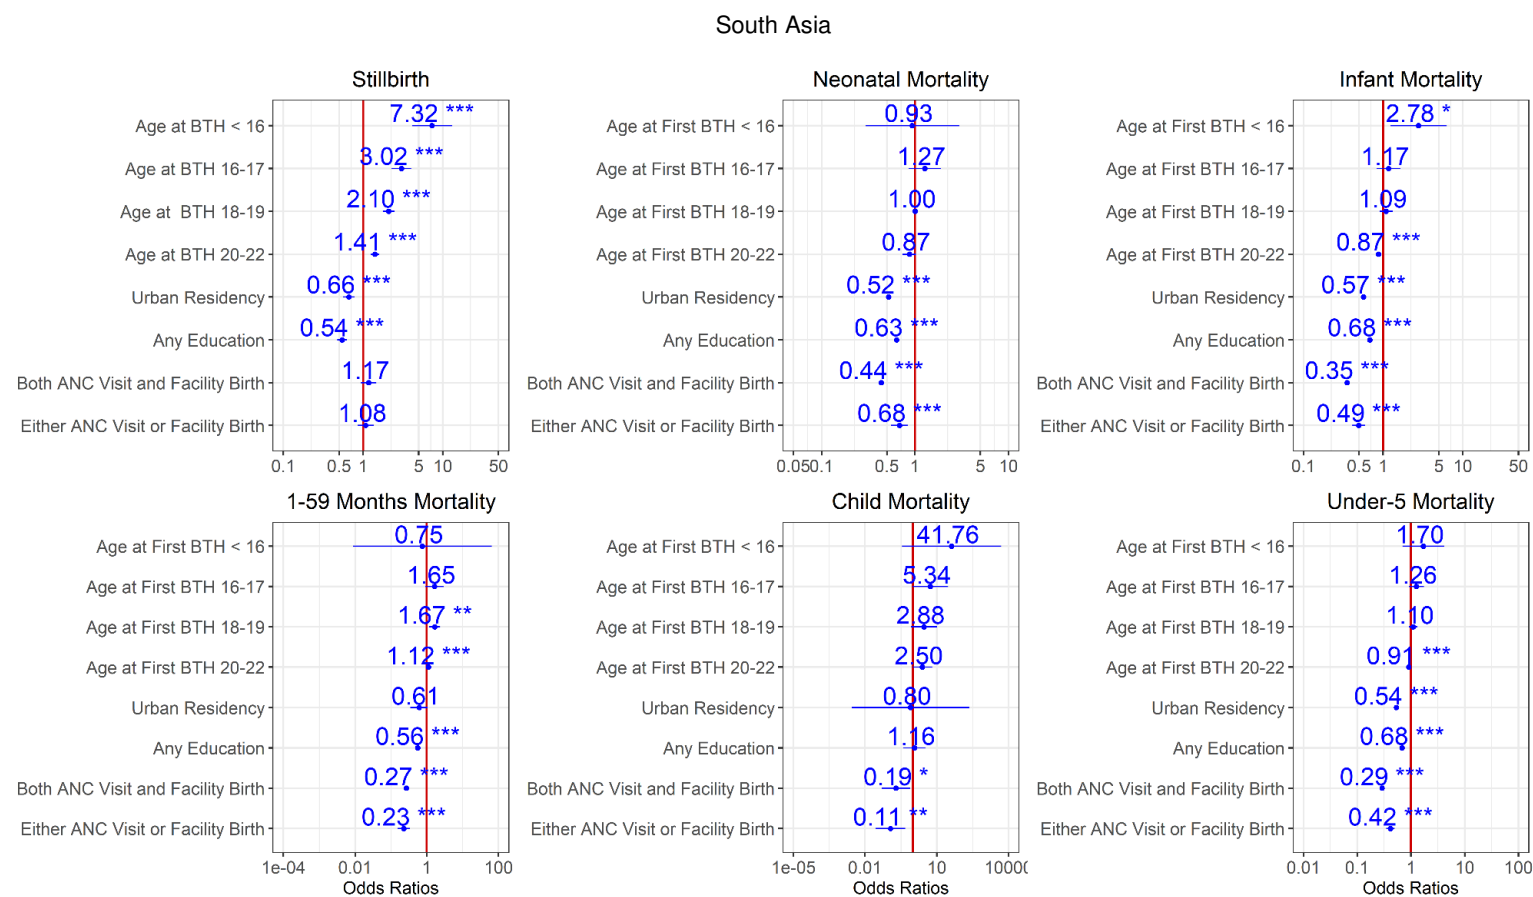

Figure 4. Ratios associated with neonate, infant, child, 1-59 months, under-5 years, and stillbirth in SSA and South Asia for the 2014-2018 survey period. Risk factors reducing the probability of death have odds ratios lower than 1 to the left of the vertical red line. Odds ratios (blue points), 95% confidence intervals (horizontal blue lines) are given. P-values are shown with asterisk signs (‘\*\*\*’ 0.001 ‘\*\*’ 0.01 ‘\*’ 0.05 ‘.’ 0.1 ‘ ’ 1). Reference group is mothers aged 23-25 years old who live in rural areas, have no formal education, are in the poorer/middle/richer wealth quintile, and had no ANC visit and at home delivery (Model 4).

SSA

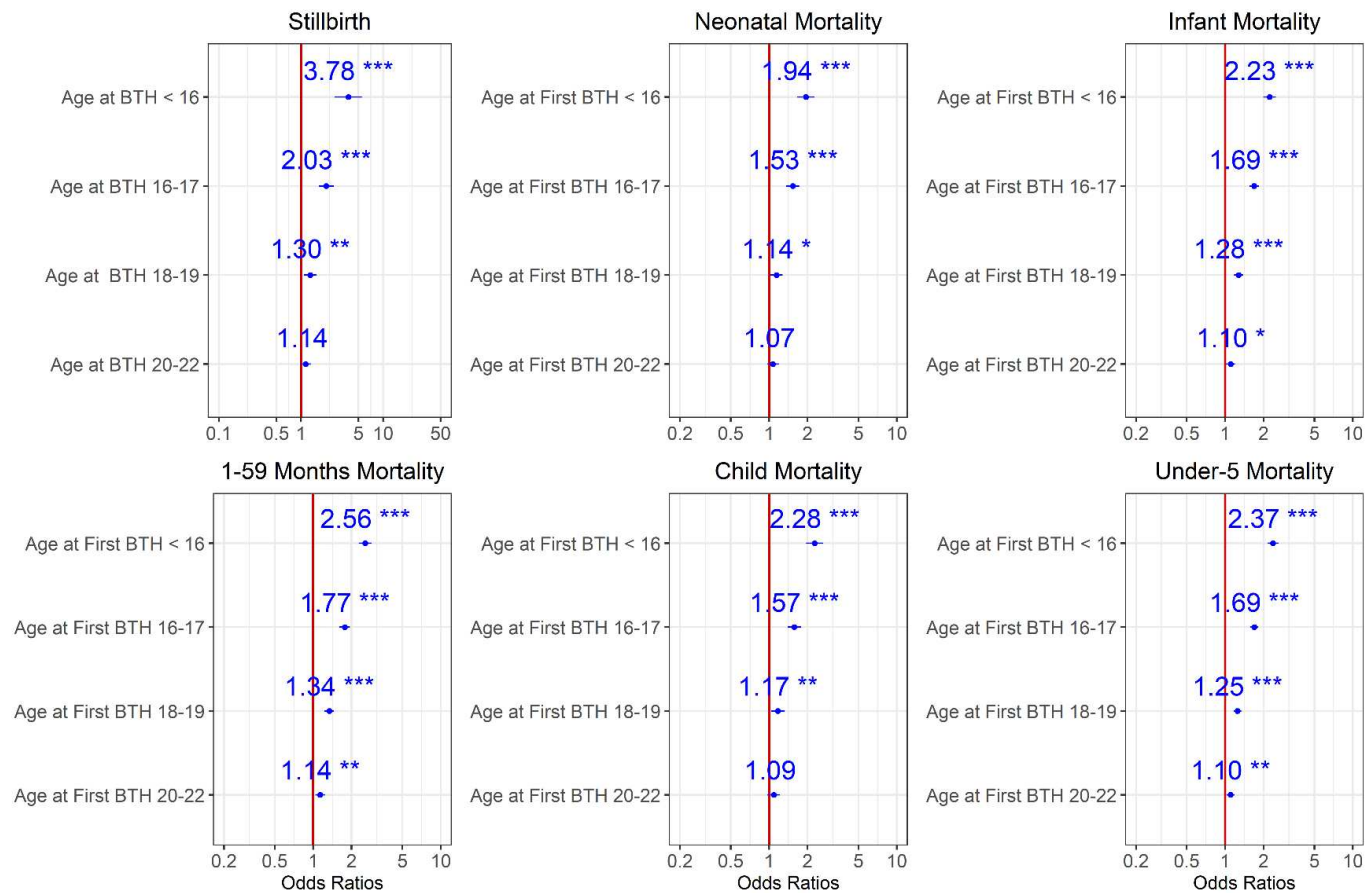

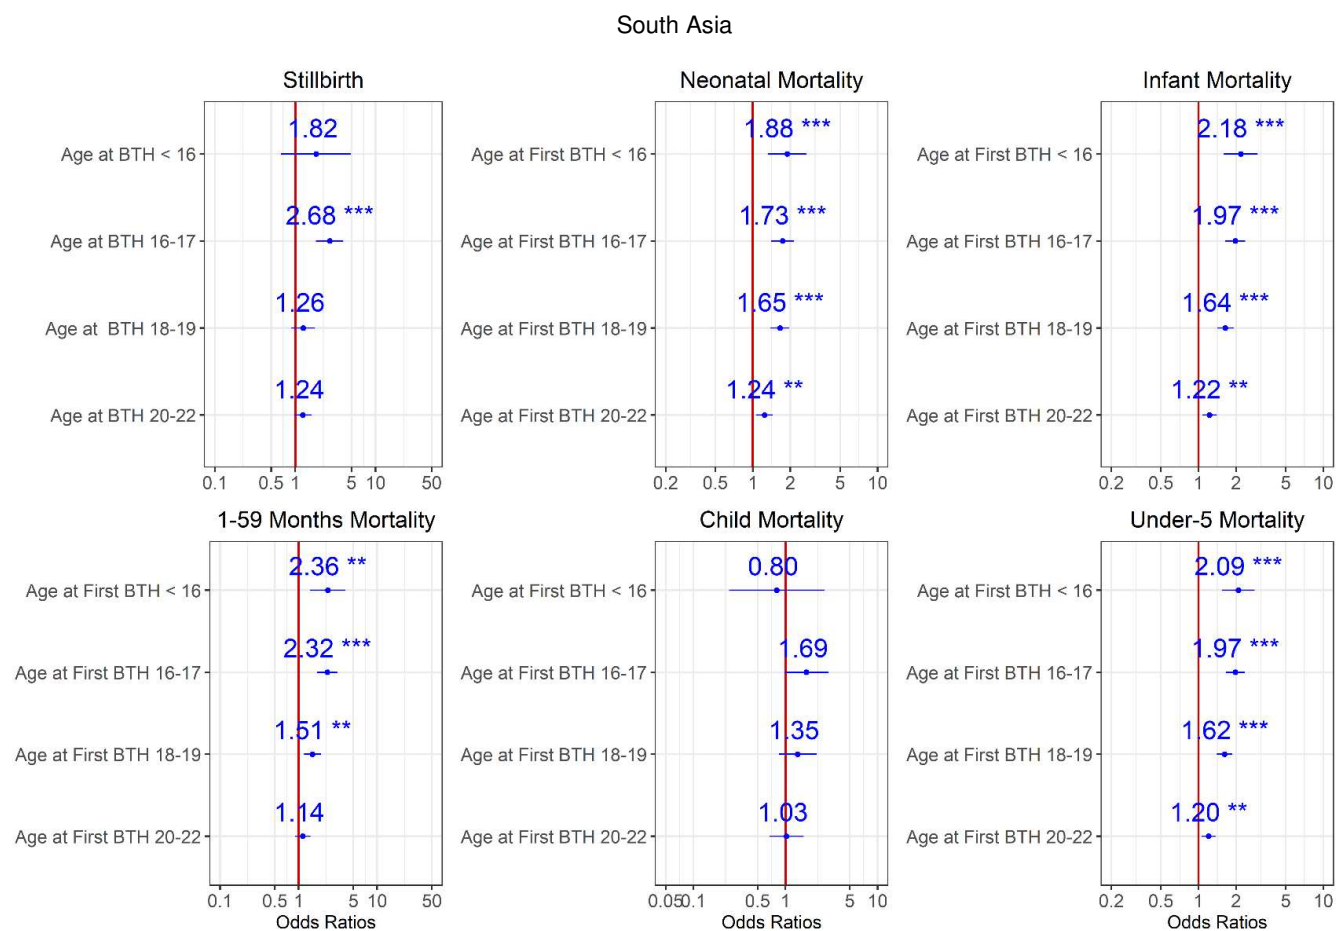

Figure 5. Ratios associated with neonate, infant, child, 1-59 months, under-5 years, and stillbirth in SSA and South Asia for the 2009-2013 survey period. Risk factors reducing the probability of death have odds ratios lower than 1 to the left of the vertical red line. Odds ratios (blue points), 95% confidence intervals (horizontal blue lines) are given. P-values are shown with the asterisk signs ('\*\*\*' 0.001 '\*\*' 0.01 '\*' 0.05 '.' 0.1 ' ' 1). Reference group is mothers aged 23-25 years old (Model 0).

SSA

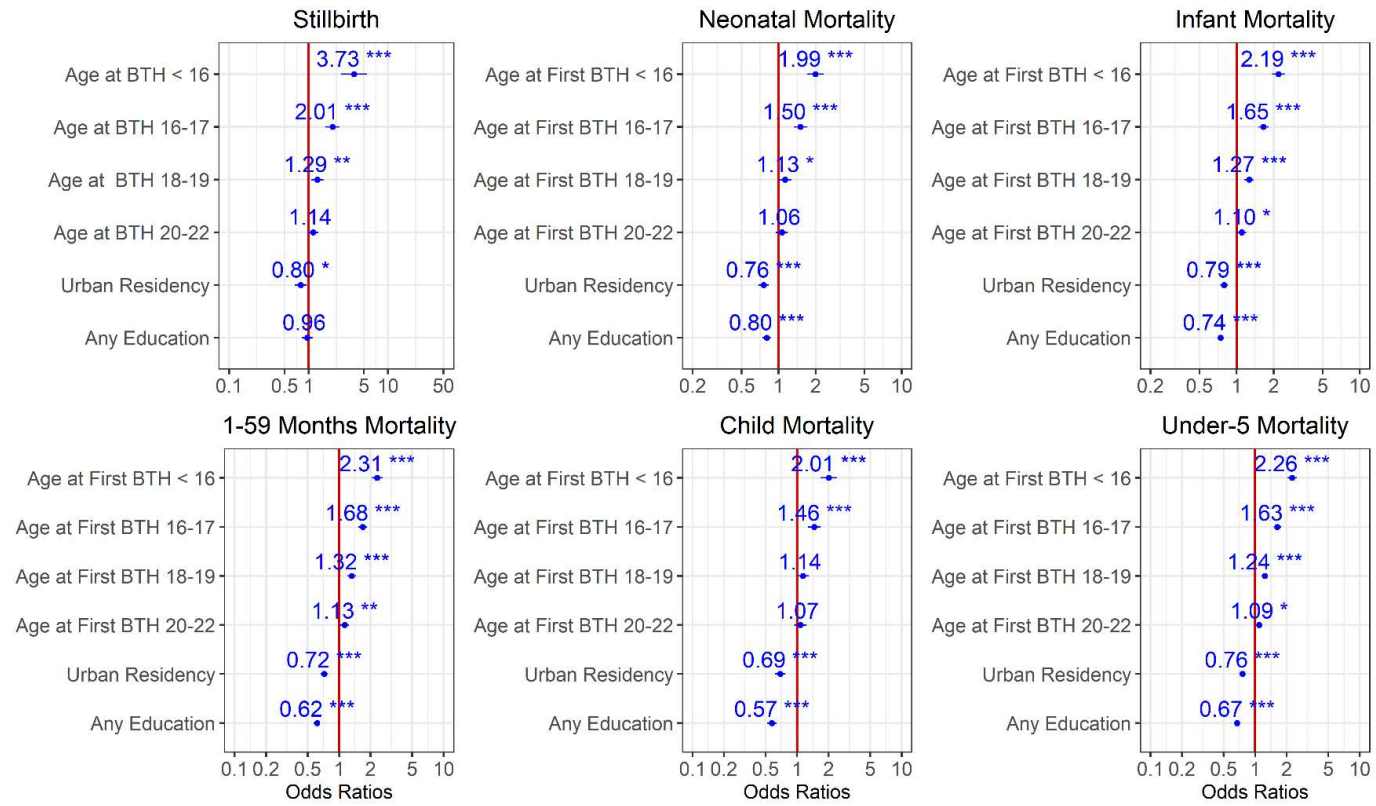

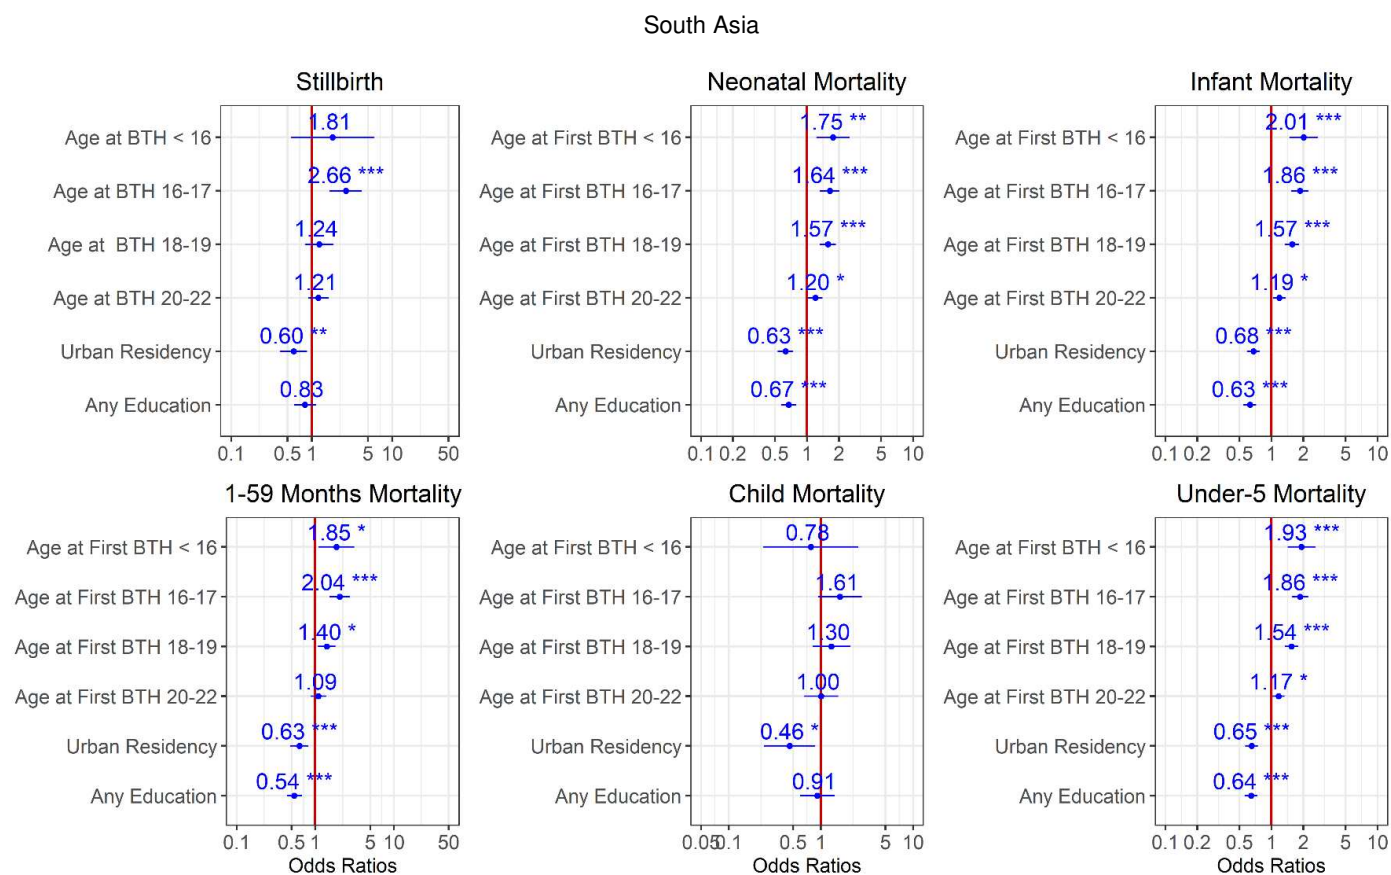

Figure 6. Ratios associated with neonate, infant, child, 1-59 months, under-5 years, and stillbirth in SSA and South Asia for the 2009-2013 survey period. Risk factors reducing the probability of death have odds ratios lower than 1 to the left of the vertical red line. Odds ratios (blue points), 95% confidence intervals (horizontal blue lines) are given. P-values are shown with the asterisk signs ('\*\*\*' 0.001 '\*\*' 0.01 '\*' 0.05 '.' 0.1 ' ' 1). Reference group is mothers aged 23-25 years old who live in rural areas and have no formal education (Model 1).

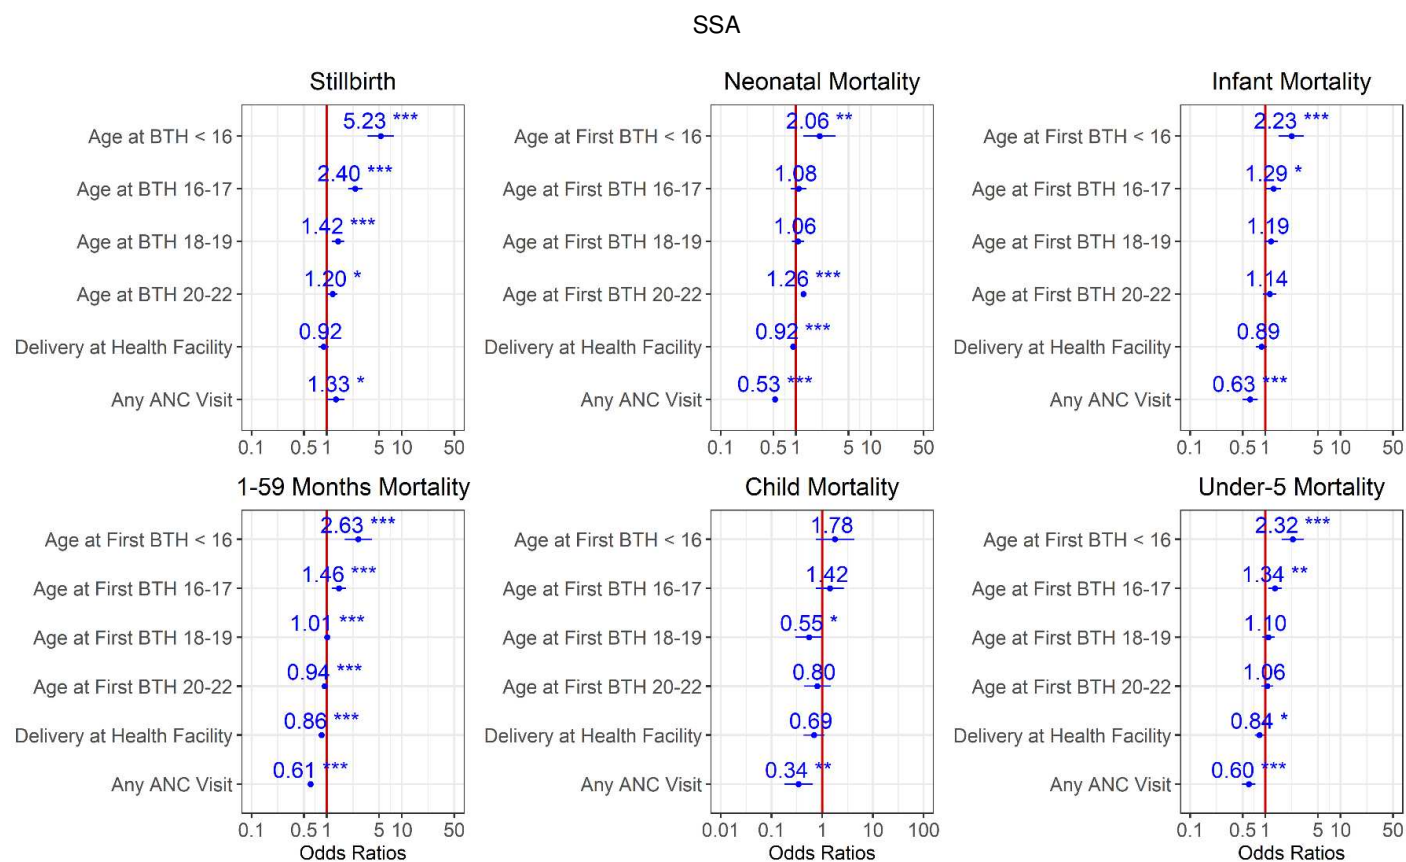

Figure 7. Ratios associated with neonate, infant, child, 1-59 months, under-5 years, and stillbirth in SSA and South Asia for the 2009-2013 survey period. Risk factors reducing the probability of death have odds ratios lower than 1 to the left of the vertical red line. Odds ratios (blue points), 95% confidence intervals (horizontal blue lines) are given. P-values are shown with the asterisk signs (‘\*\*\*’ 0.001 ‘\*\*’ 0.01 ‘\*’ 0.05 ‘.’ 0.1 ‘ ’ 1). Reference group is mothers aged 23-25 years old who delivered at home, and had no ANC visit (Model 2).



SSA

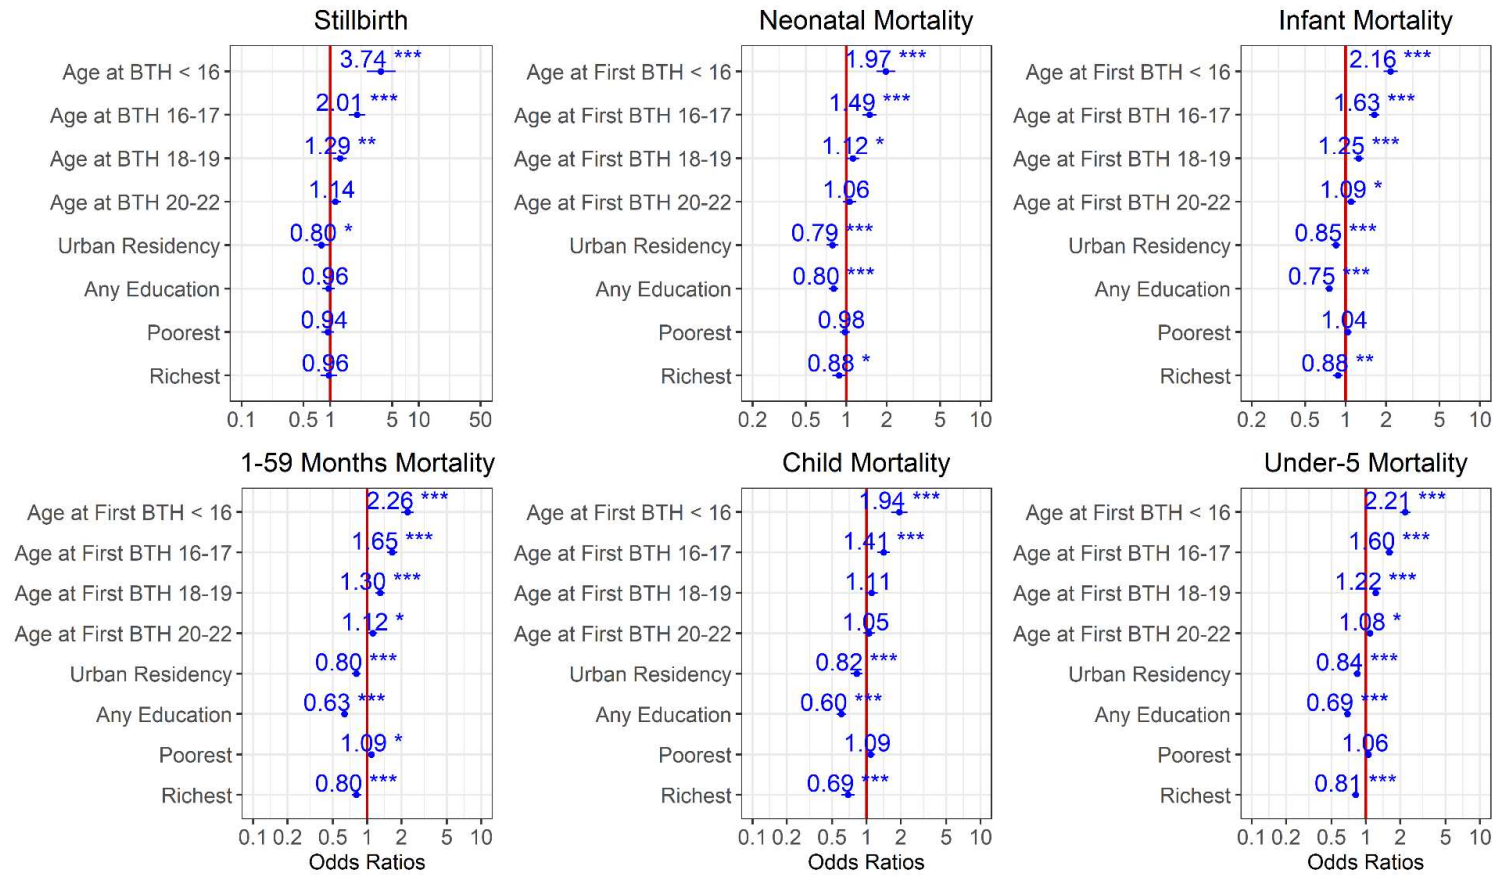

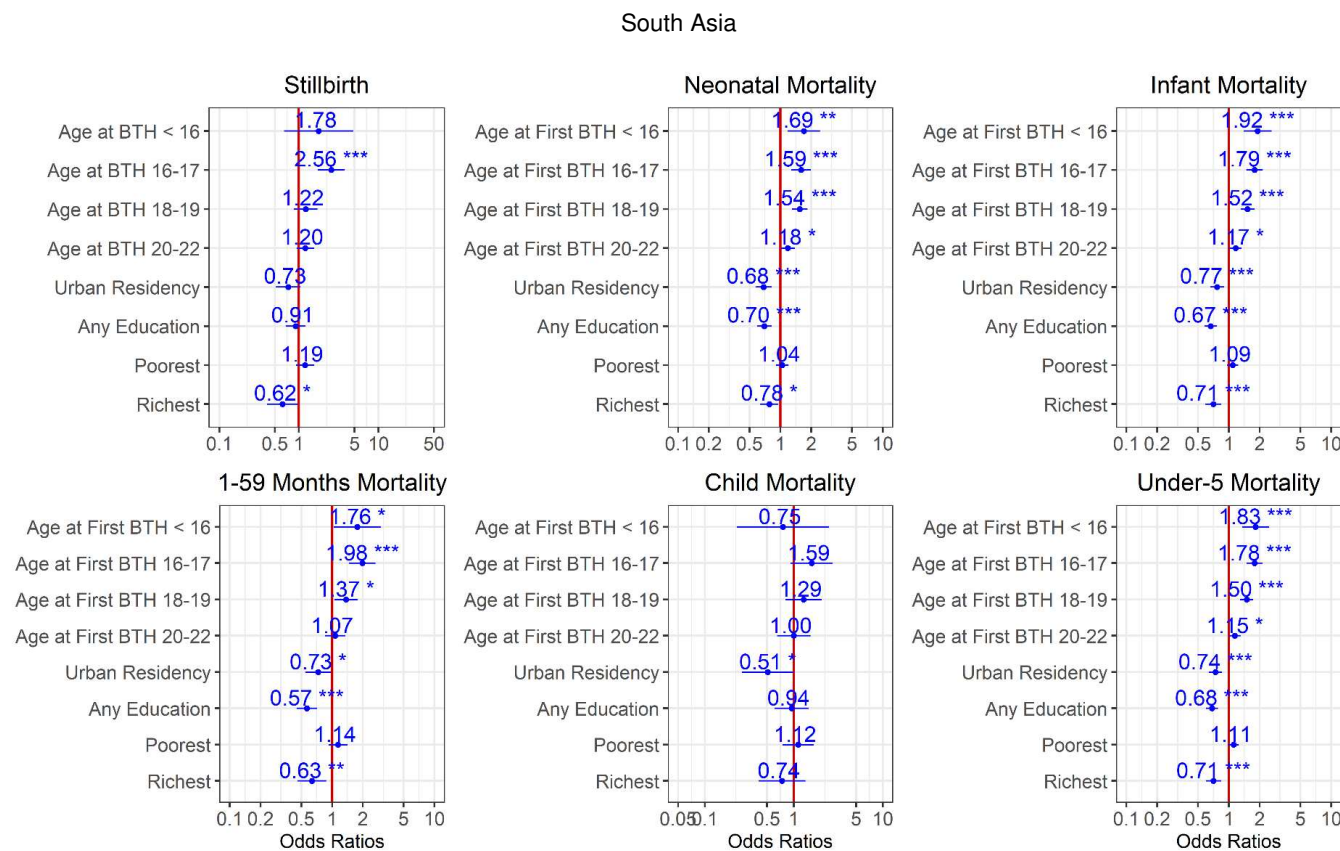

Figure 8. Ratios associated with neonate, infant, child, 1-59 months, under-5 years, and stillbirth in SSA for the 2009-2013 survey period. Risk factors reducing the probability of death have odds ratios lower than 1 to the left of the vertical red line. Odds ratios (blue points), 95% confidence intervals (horizontal blue lines) are given. P-values are shown with asterisk signs (\*\*\*\* 0.001 \*\*\* 0.01 \*\* 0.05 \* 0.1 ' ' 1). Reference group is mothers aged 23-25 years old who live in rural areas, have no formal education, and are in the poorer/middle/richer wealth quintile (Model 3).



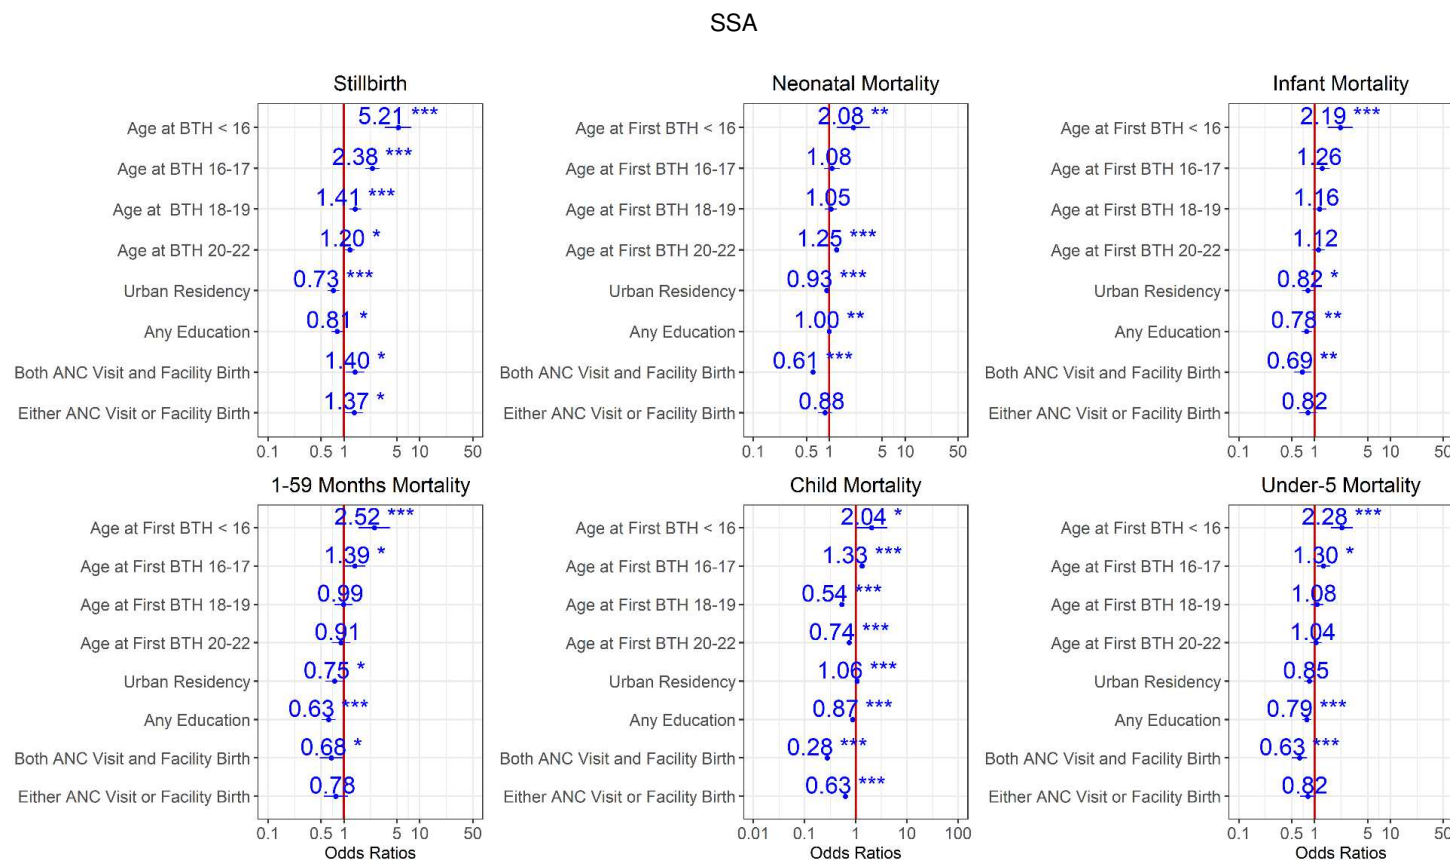

Figure 9. Ratios associated with neonate, infant, child, 1-59 months, under-5 years, and stillbirth in SSA for the 2009-2013 survey period. Risk factors reducing the probability of death have odds ratios lower than 1 to the left of the vertical red line. Odds ratios (blue points), 95% confidence intervals (horizontal blue lines) are given. P-values are shown with the asterisk signs (\*\*\*\* 0.0001 \*\*\* 0.001 \*\* 0.01 \* 0.05 . 0.1 ' 1). Reference group is mothers aged 23-25 years old who live in rural areas, have no formal education, are in the poorer/middle/richer wealth quintile, and had no ANC visit and at home delivery (Model 4).

SSA

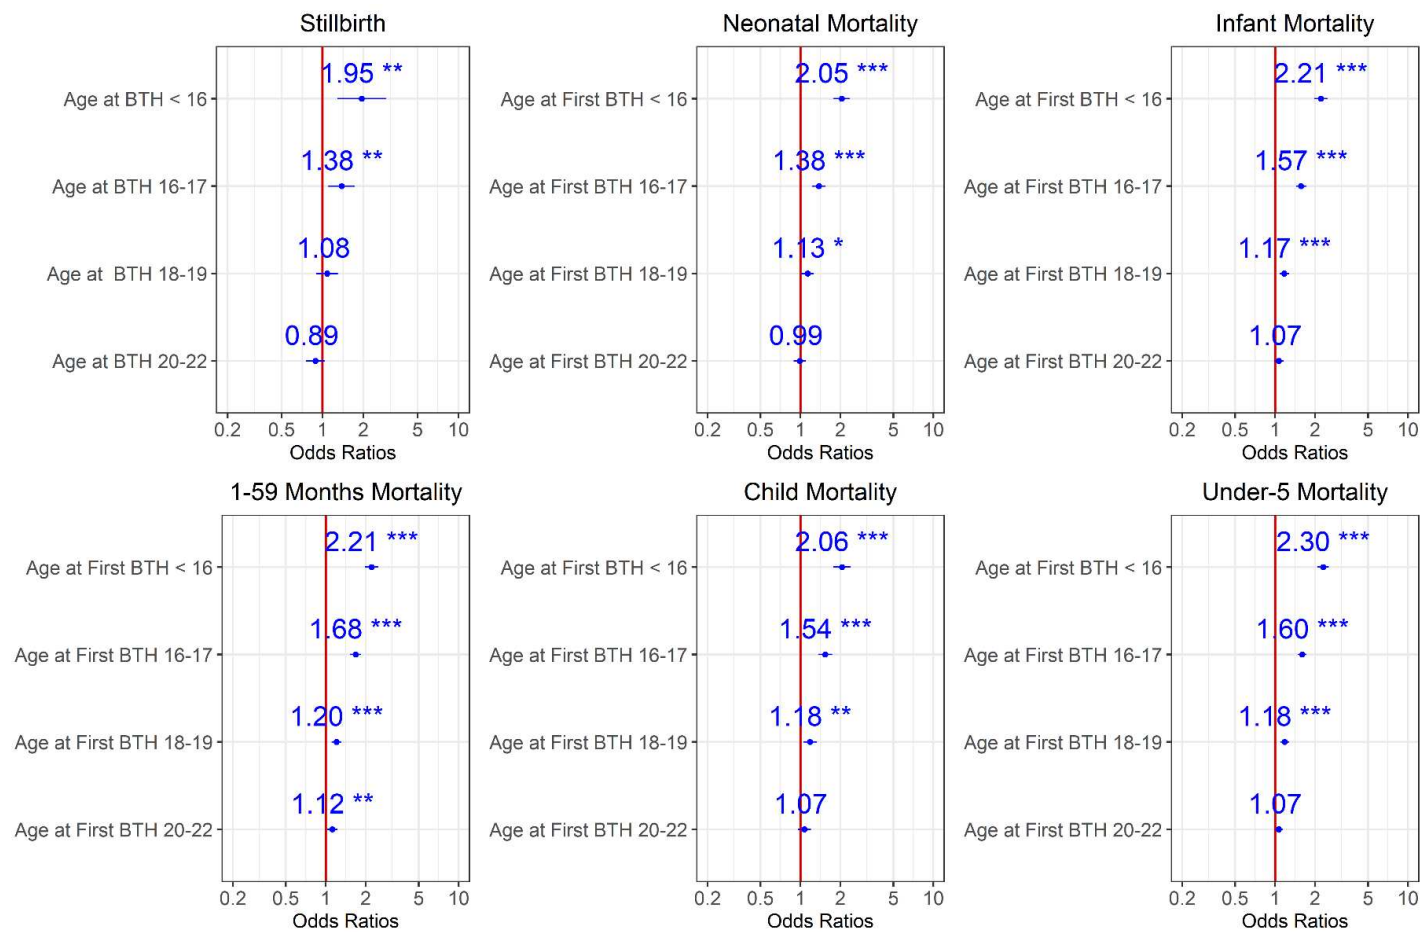

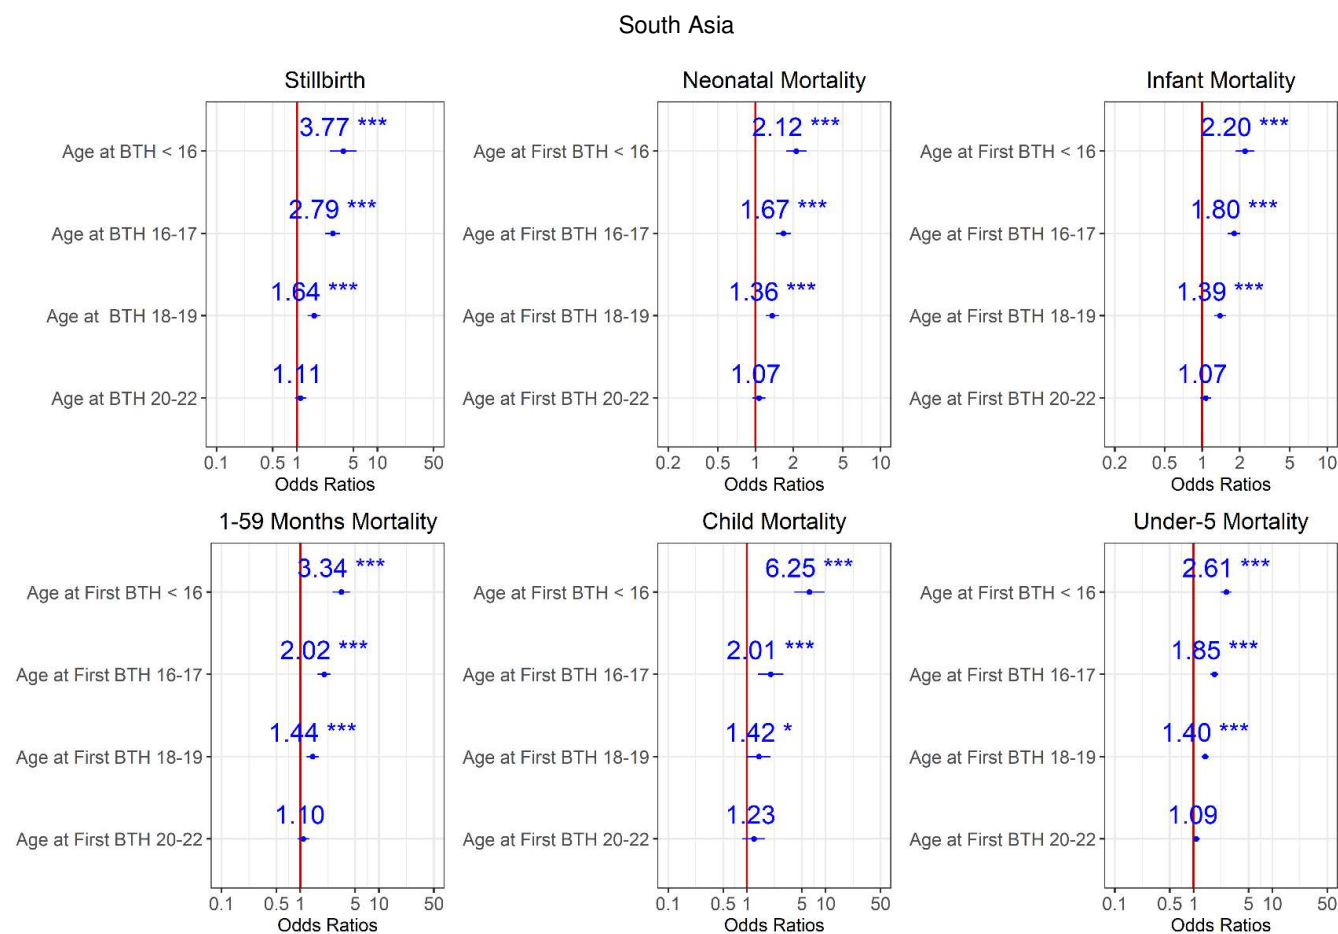

Figure 10. Ratios associated with neonate, infant, child, 1-59 months, under-5 years, and stillbirth in SSA and South Asia for the 2004-2008 survey period. Risk factors reducing the probability of death have odds ratios lower than 1 to the left of the vertical red line. Odds ratios (blue points), 95% confidence intervals (horizontal blue lines) are given. P-values are shown with the asterisk signs (‘\*\*\*’ 0.001 ‘\*\*’ 0.01 ‘\*’ 0.05 ‘.’ 0.1 ‘ ’ 1). Reference group is mothers aged 23-25 years old (Model 0).

SSA

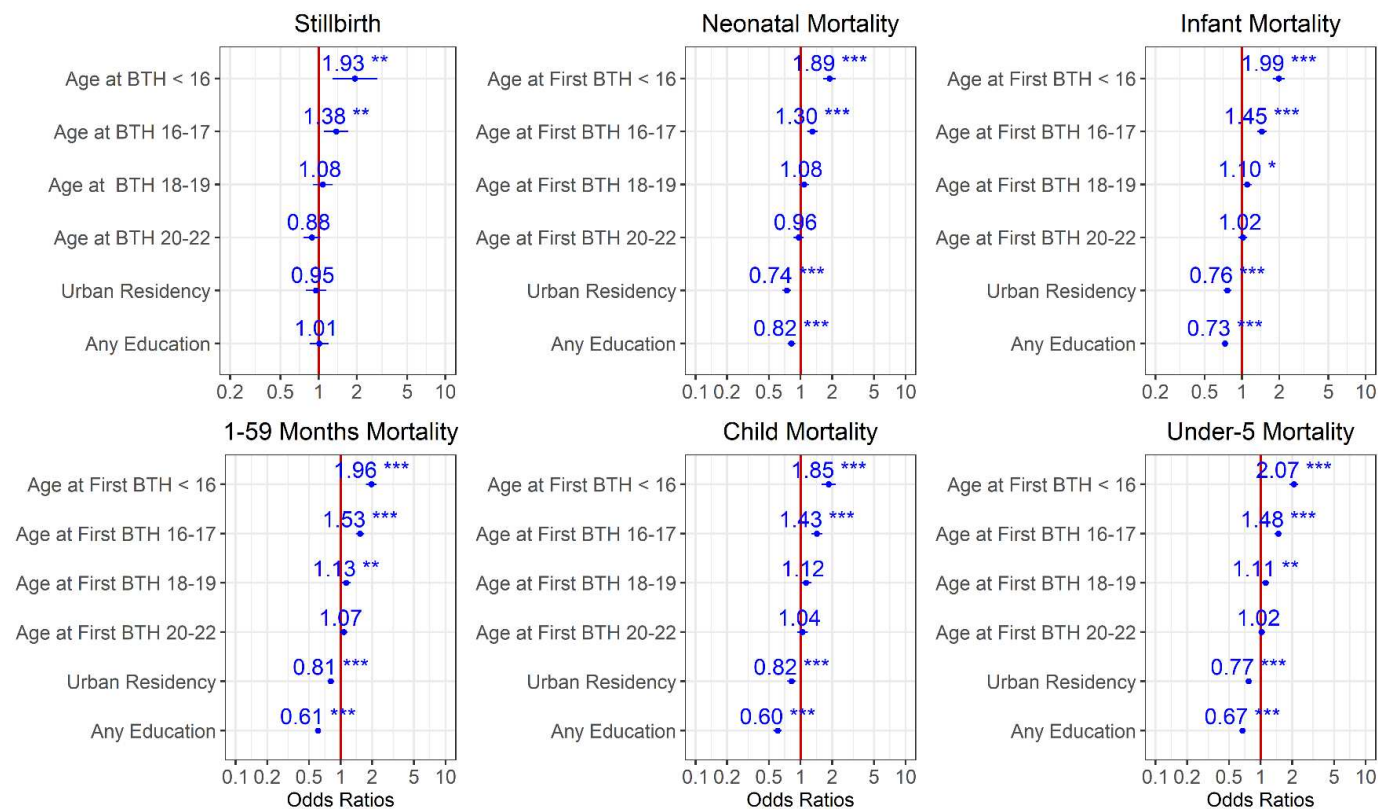

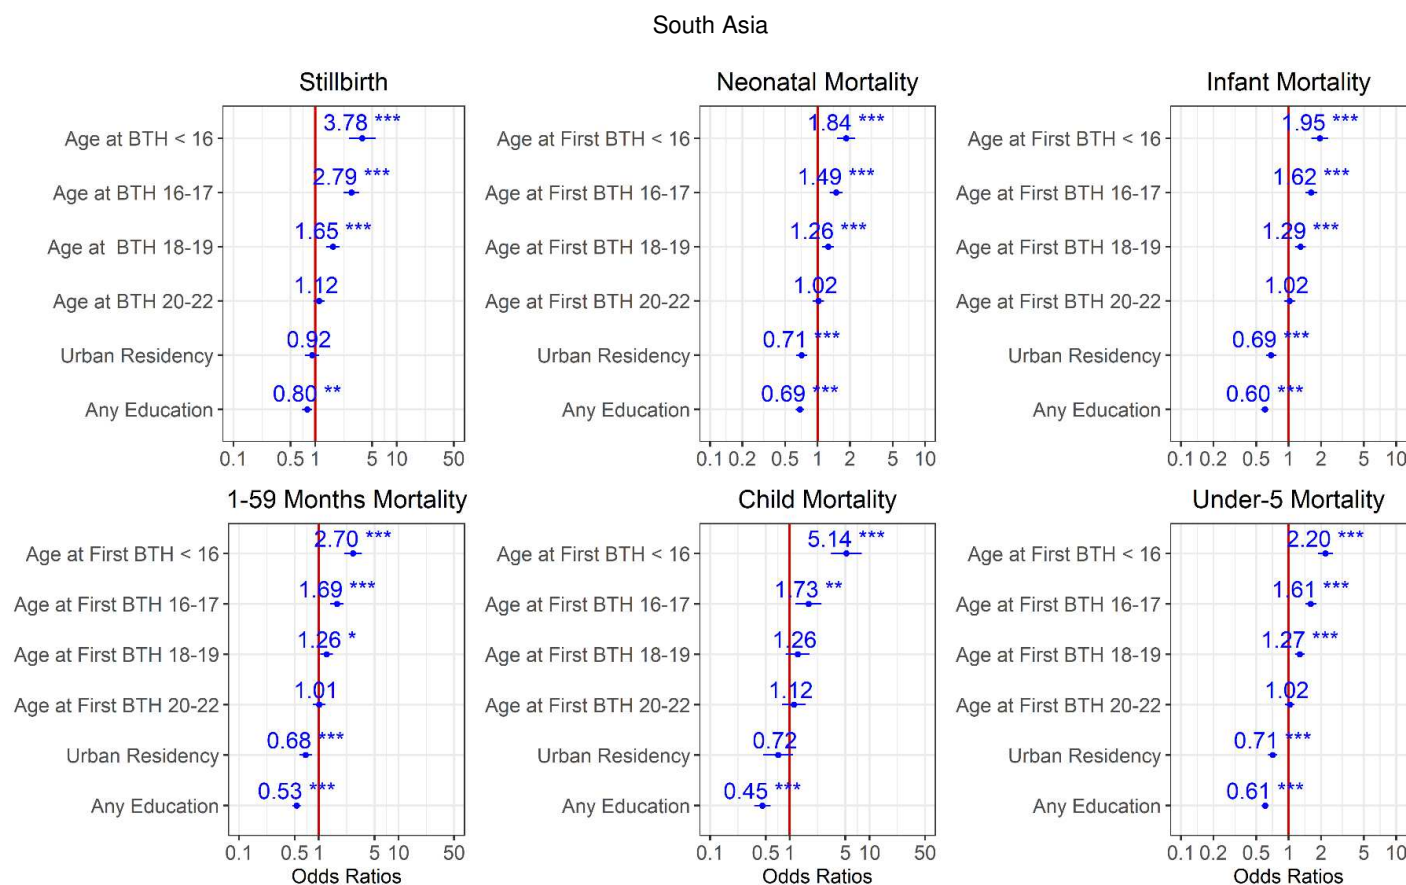

Figure 11. Ratios associated with neonate, infant, child, 1-59 months, under-5 years, and stillbirth in SSA and South Asia for the 2004-2008 survey period. Risk factors reducing the probability of death have odds ratios lower than 1 to the left of the vertical red line. Odds ratios (blue points), 95% confidence intervals (horizontal blue lines) are given. P-values are shown with the asterisk signs ('\*\*\*' 0.001 '\*\*' 0.01 '\*' 0.05 '.' 0.1 ' ' 1). Reference group is mothers aged 23-25 years old who live in rural areas and have no formal education (Model 1).

SSA

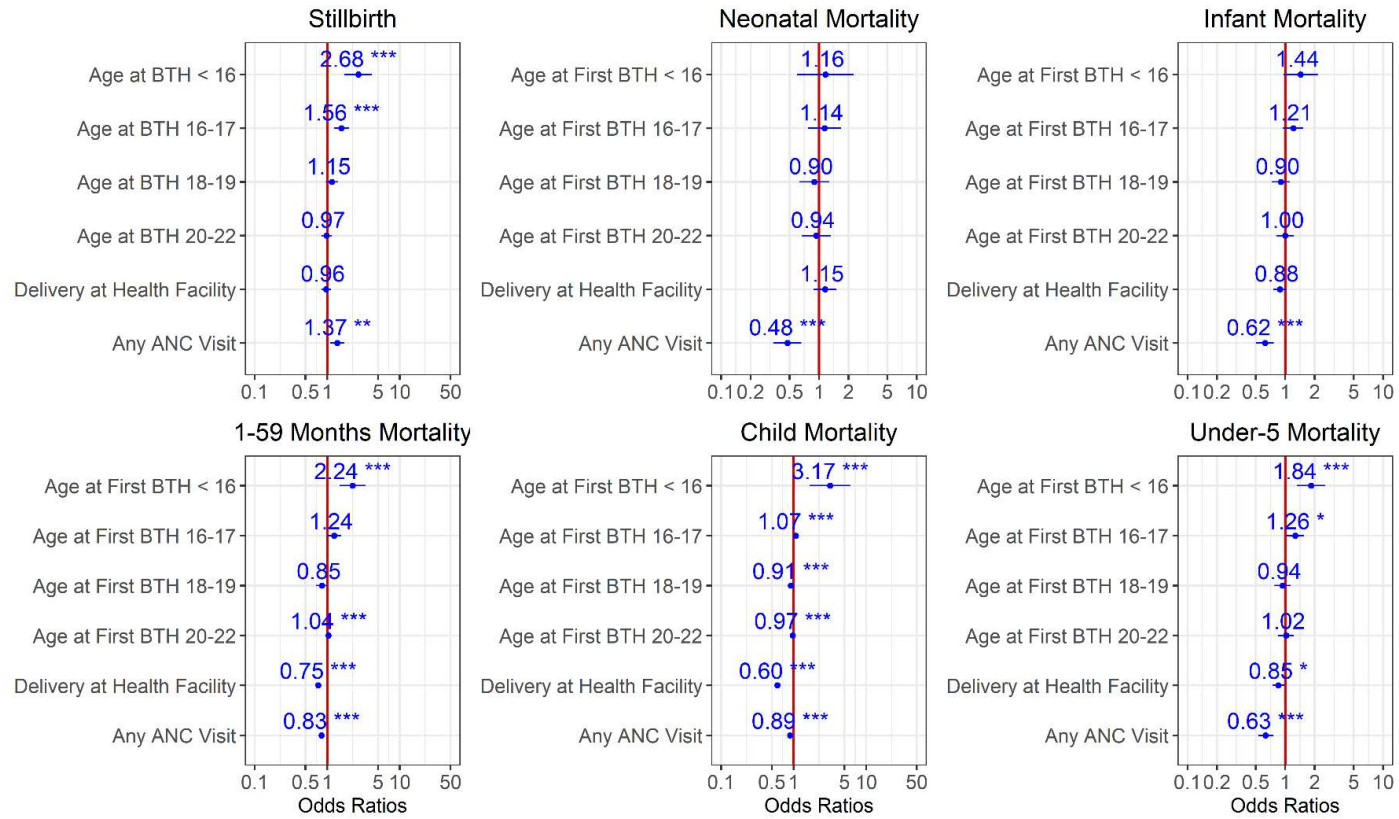



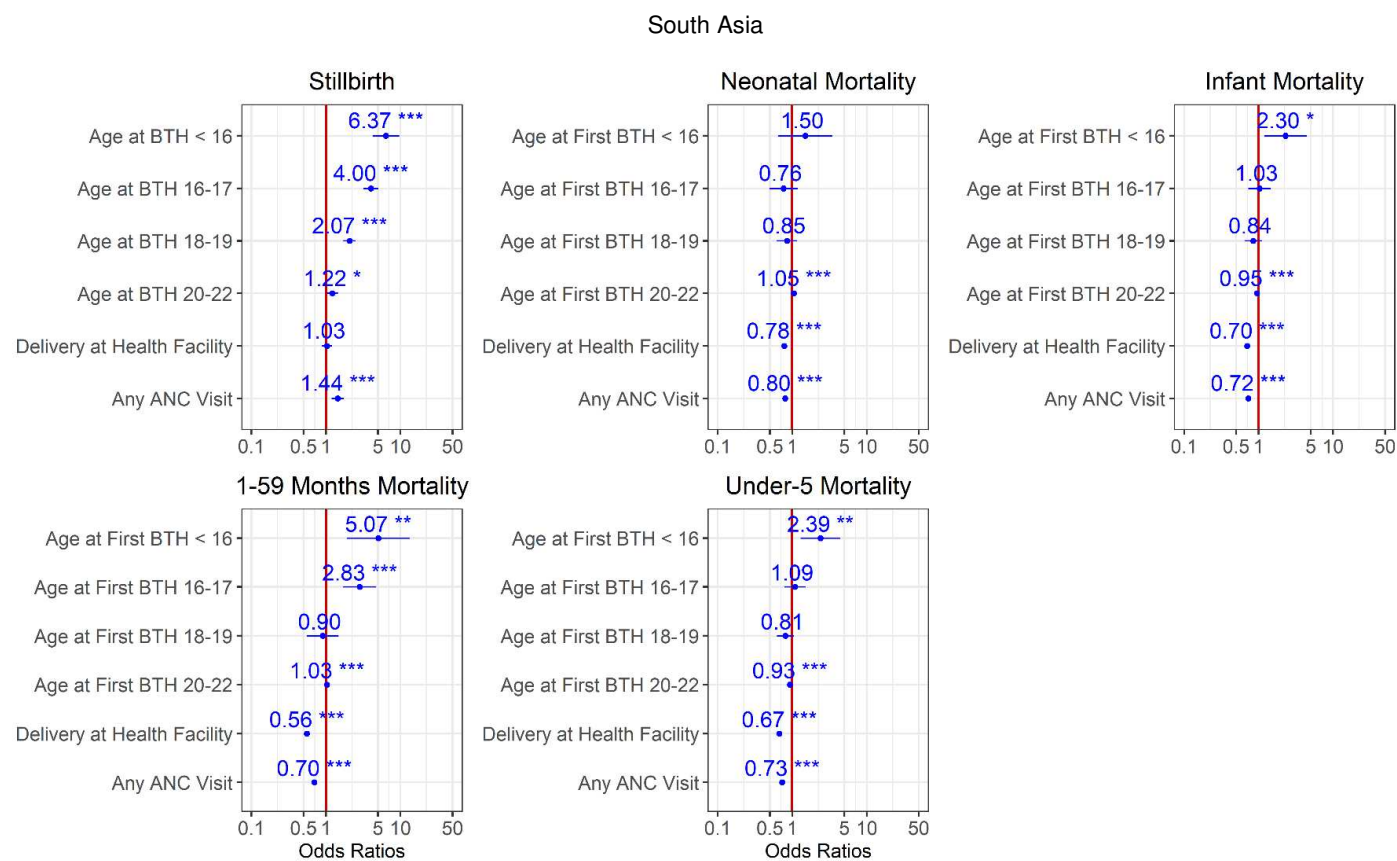

Figure 12. Ratios associated with neonate, infant, child, 1-59 months, under-5 years, and stillbirth in SSA and South Asia for the 2004-2008 survey period. Risk factors reducing the probability of death have odds ratios lower than 1 to the left of the vertical red line. Odds ratios (blue points), 95% confidence intervals (horizontal blue lines) are given. P-values are shown with the asterisk signs ('\*\*\*' 0.001 '\*\*' 0.01 '\*' 0.05 '.' 0.1 ' ' 1). Reference group is mothers aged 23-25 years old who delivered at home and have no ANC visits (Model 2).

SSA

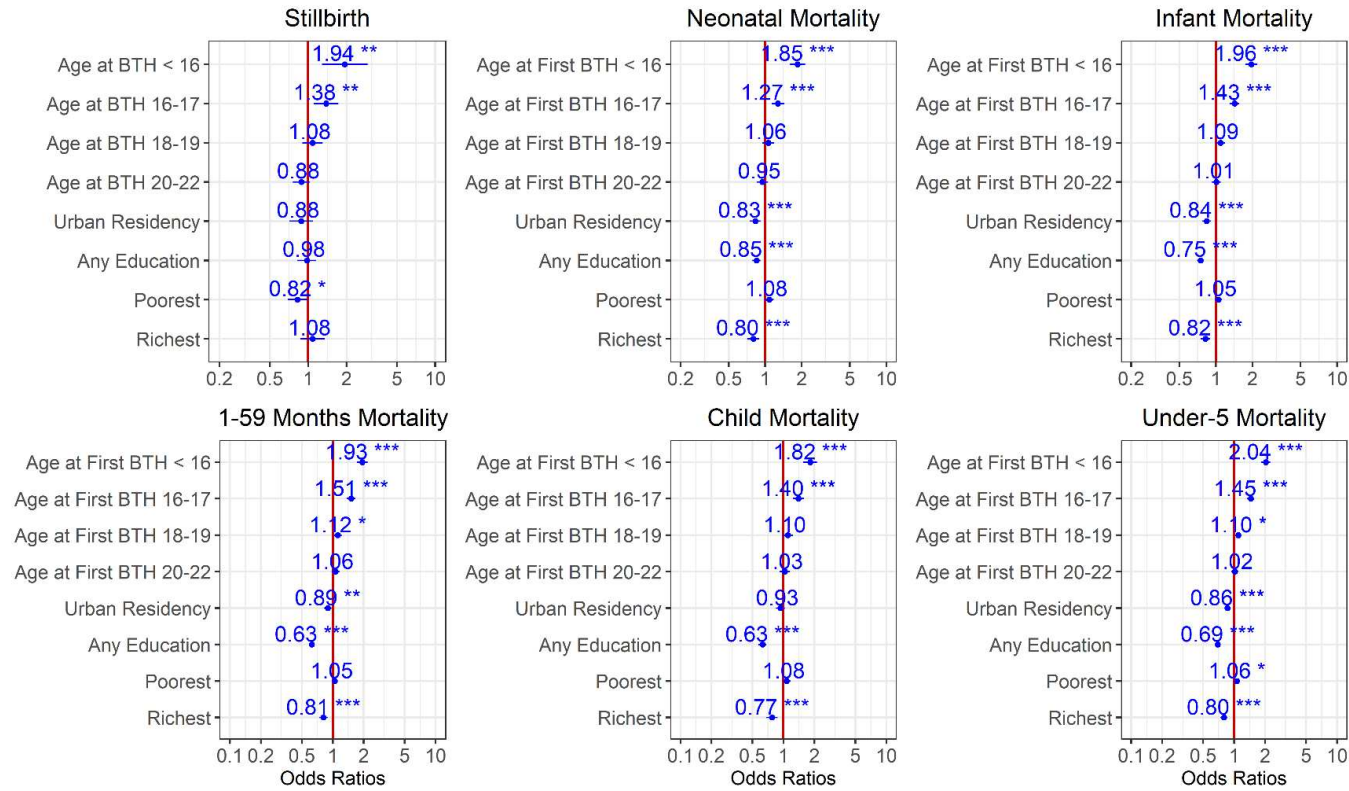



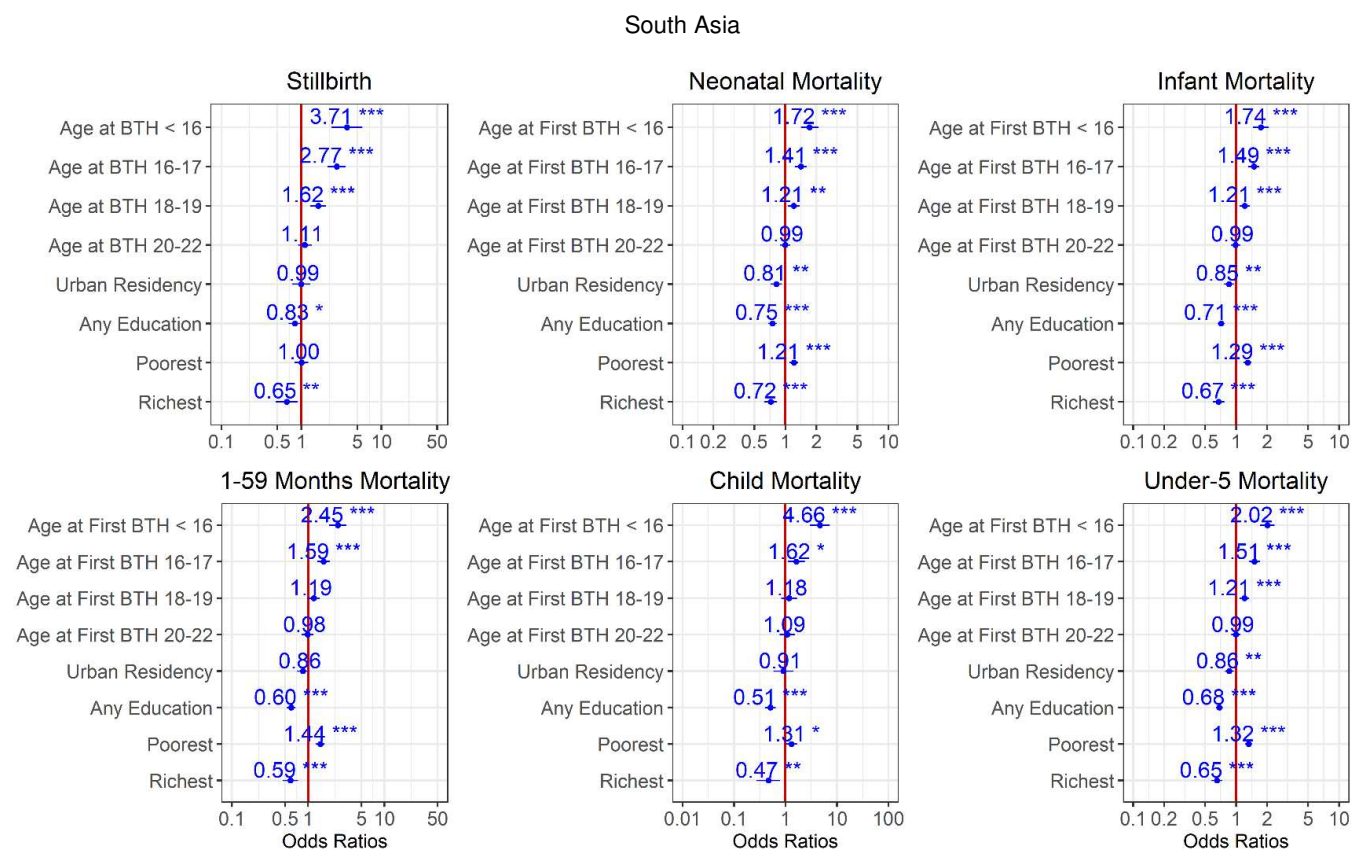

Figure 13. Ratios associated with neonate, infant, child, 1-59 months, under-5 years, and stillbirth in SSA and South Asia for the 2004-2008 survey period. Risk factors reducing the probability of death have odds ratios lower than 1 to the left of the vertical red line. Odds ratios (blue points), 95% confidence intervals (horizontal blue lines) are given. P-values are shown with the asterisk signs ('\*\*\*' 0.001 '\*\*' 0.01 '\*' 0.05 '.' 0.1 '.' 1). Reference group is mothers aged 23-25 years old who live in rural areas, have no formal education, and are in the poorer/middle/richer wealth quintile, (Model 3).

SSA

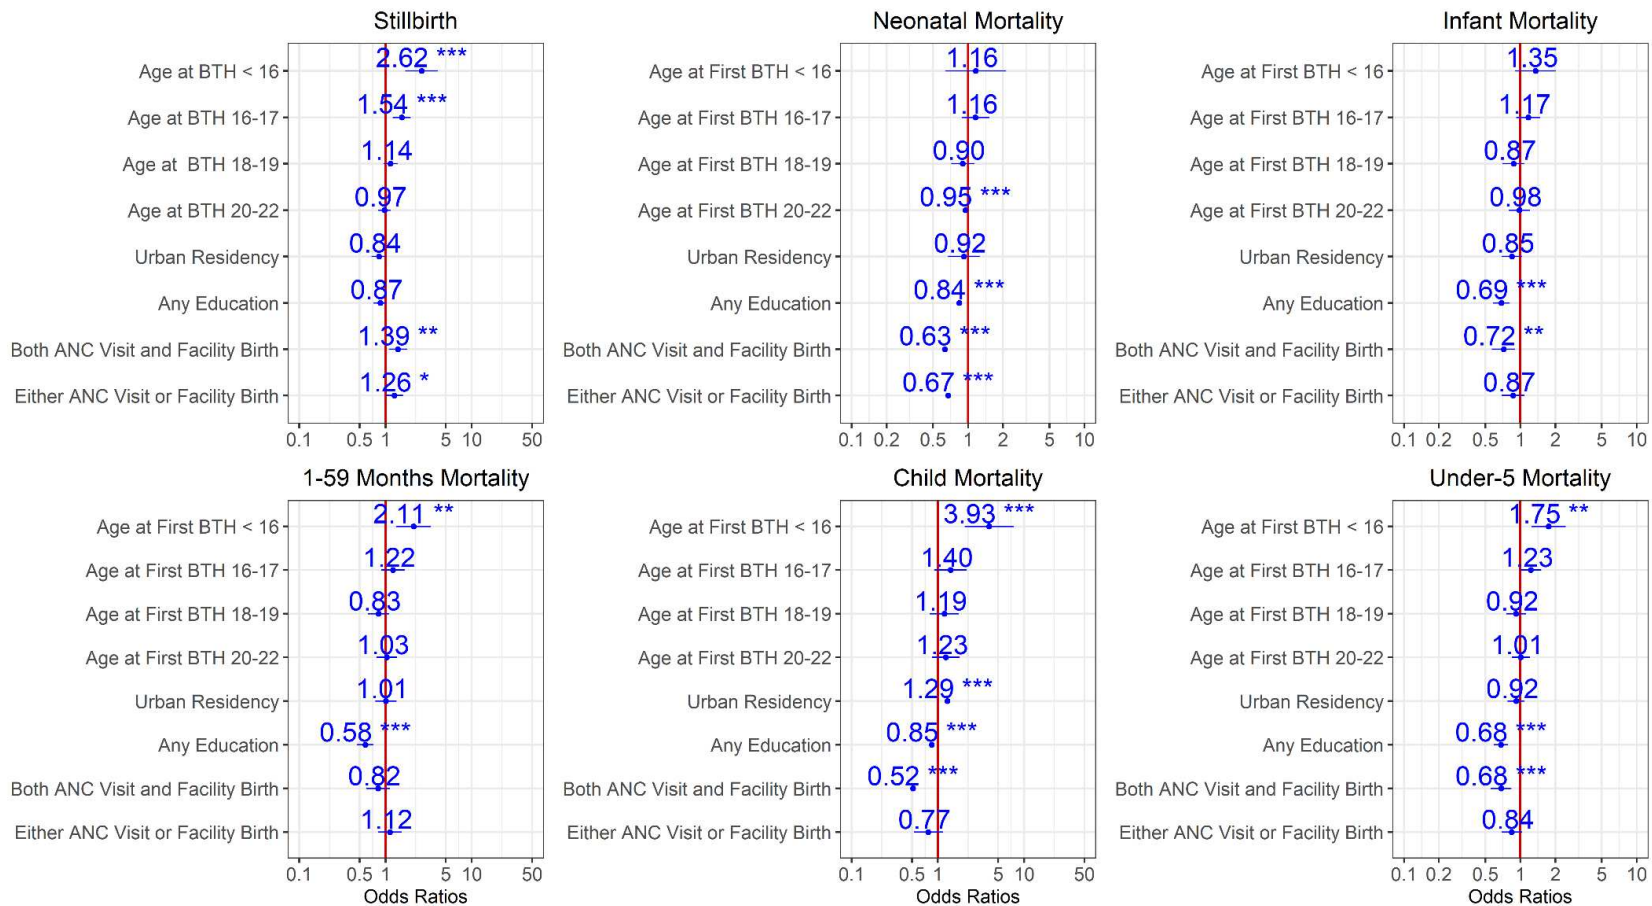

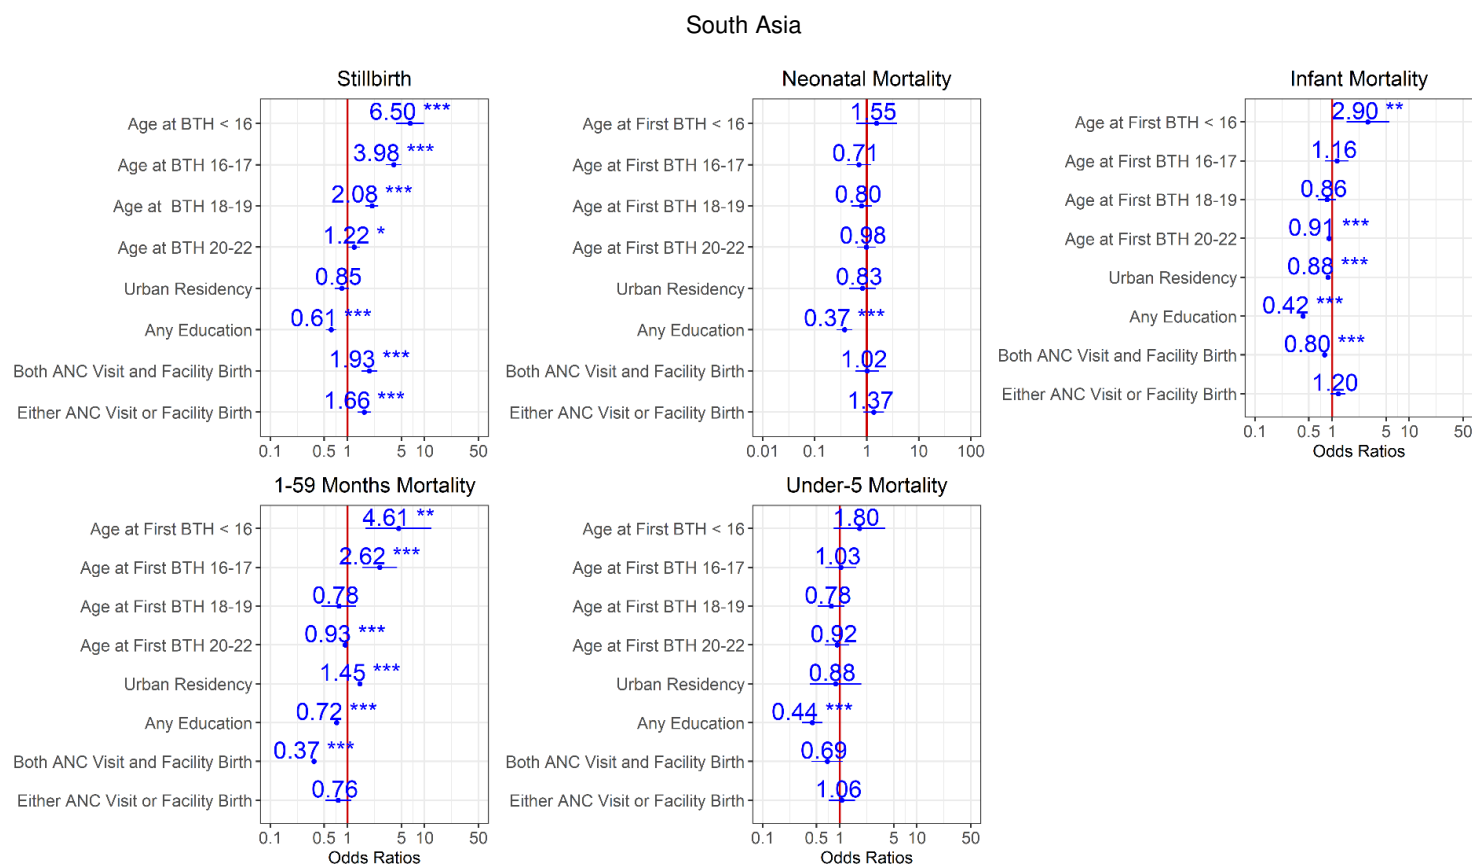

Figure 14. Ratios associated with neonate, infant, child, 1-59 months, under-5 years, and stillbirth in SSA and South Asia for the 2004-2008 survey period. Risk factors reducing the probability of death have odds ratios lower than 1 to the left of the vertical red line. Odds ratios (blue points), 95% confidence intervals (horizontal blue lines) are given, P-values are shown with the asterisk signs (‘\*\*\*’ 0.001 ‘\*\*’ 0.01 ‘\*’ 0.05 ‘.’ 0.1 ‘ ’ 1). Reference group is mothers aged 23-25 years old who live in rural areas, have no formal education, are in the poorer/middle/richer wealth quintile, and had no ANC visit and at home delivery (Model 4).

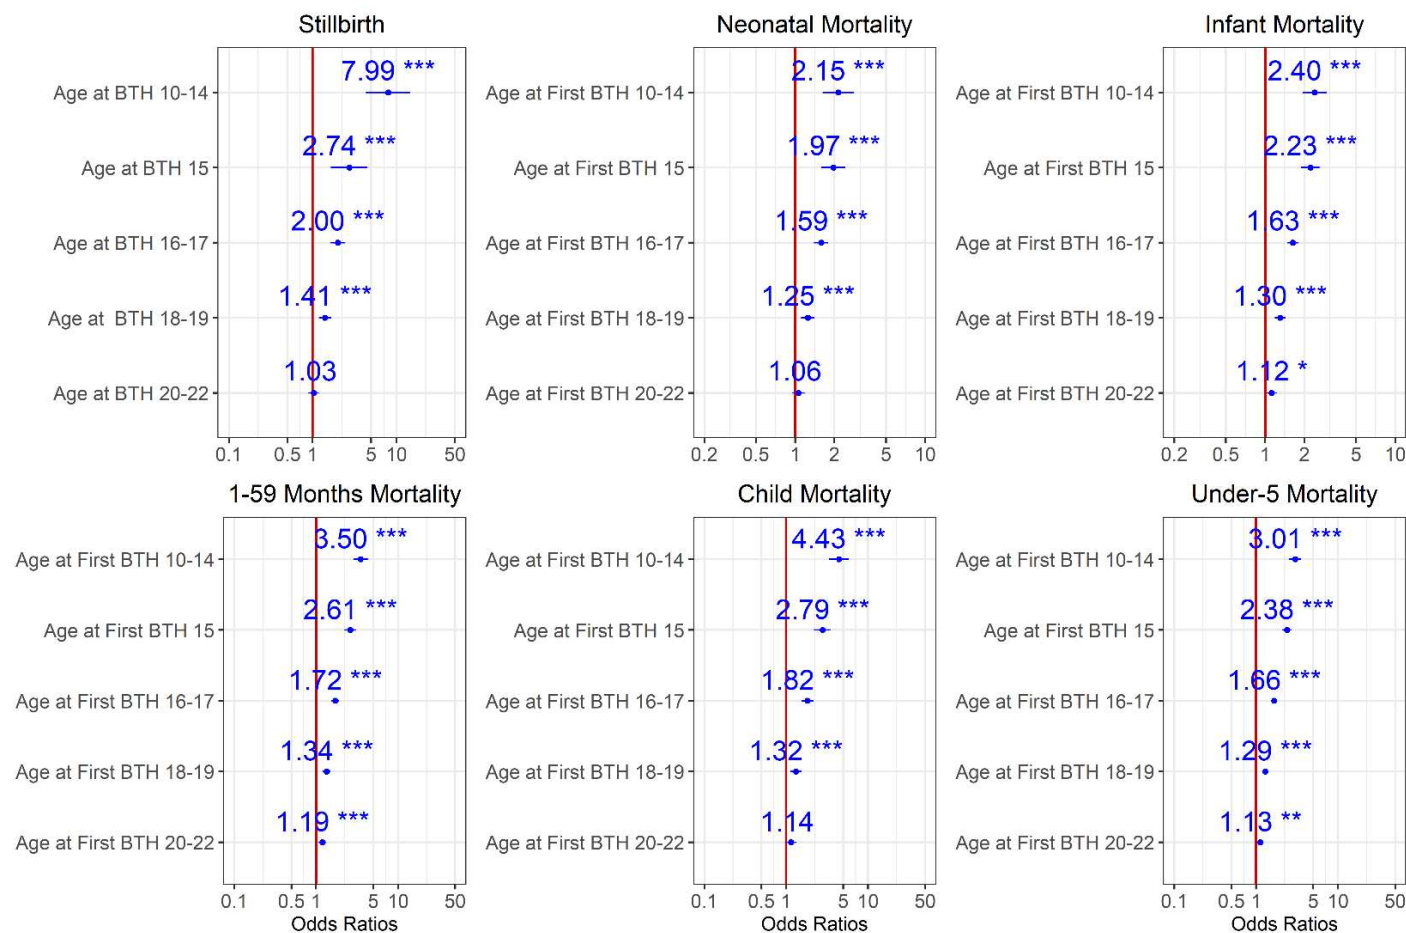

Figure 15. Ratios associated with neonate, infant, child, 1-59 months, under-5 years, and stillbirth in SSA for the 2014-2018 survey period. Risk factors reducing the probability of death have odds ratios lower than 1 to the left of the vertical red line. Odds ratios (blue points), 95% confidence intervals (horizontal blue lines) are given. P-values are shown with asterisk signs (‘\*\*\*’ 0.001 ‘\*\*’ 0.01 ‘\*’ 0.05 ‘.’ 0.1 ‘ ’ 1). Reference group is mothers aged 23-25 years old.

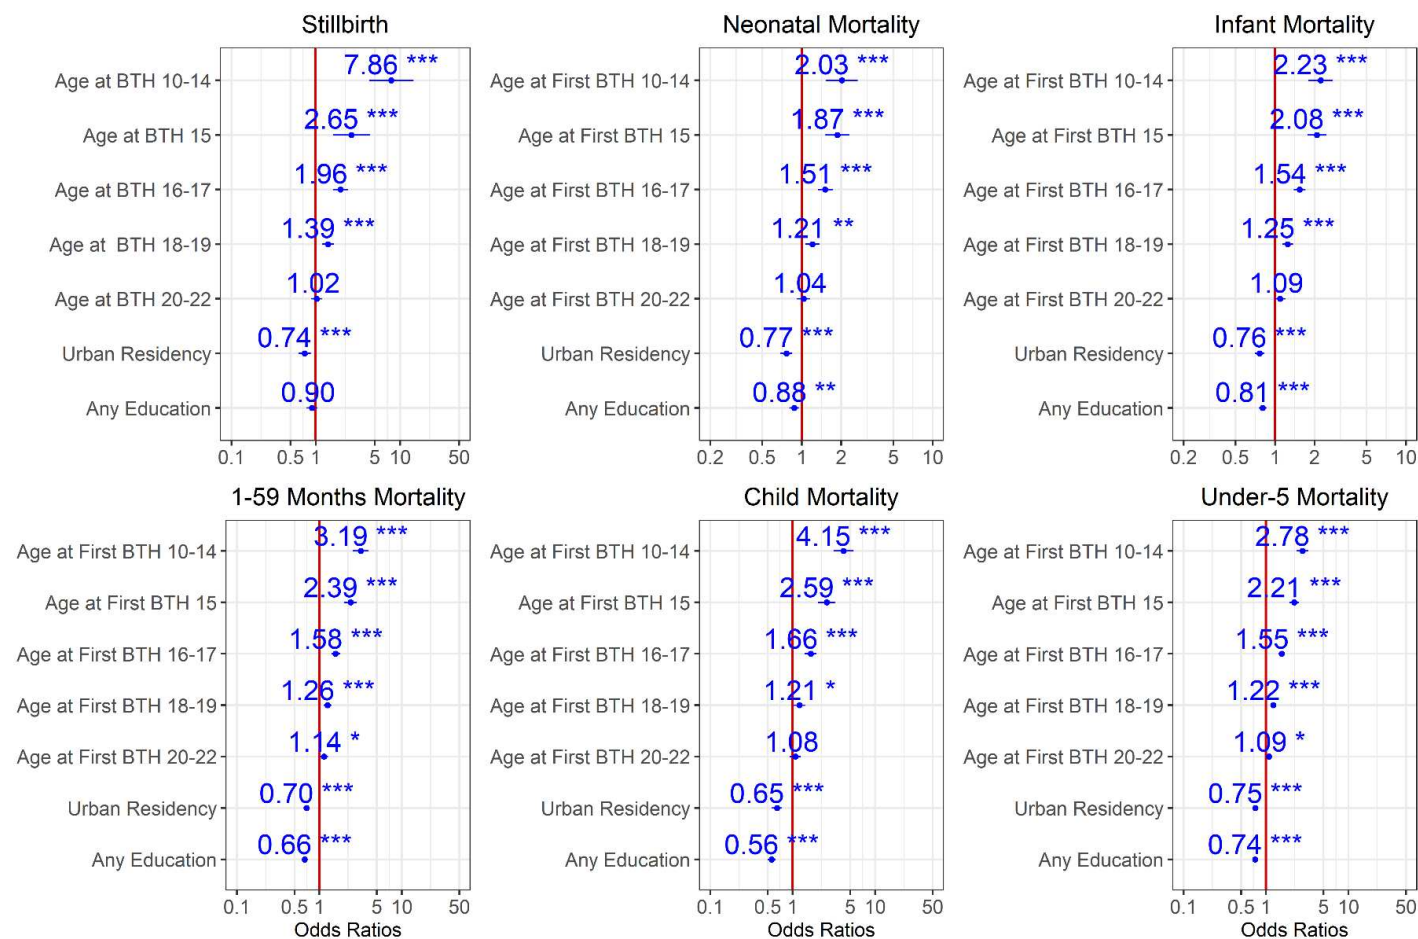

Figure 16. Ratios associated with neonate, infant, child, 1-59 months, under-5 years, and stillbirth in SSA for the 2014-2018 survey period. Risk factors reducing the probability of death have odds ratios lower than 1 to the left of the vertical red line. Odds ratios (blue points), 95% confidence intervals (horizontal blue lines) are given. P-values are shown with asterisk signs (\*\*\*\*) 0.001 (\*\*\*) 0.01 (\*) 0.05 (.) 0.1 (‘) 1). Reference group is mothers aged 23-25 years old who live in rural areas, and have no formal education.
